# Supplementary material
Source: ML conference proceedings conference paper supplement (https://openaccess.thecvf.com/content/CVPR2022/html/Shalev_Image_Animation_With_CVPR_2022_paper.html)
Supplement: Supplementary file 1 [file Shalev_Image_Animation_With_CVPR_2022_supplemental.pdf]

# Supplementary Material: Image Animation with Perturbed Masks

Yoav Shalev      Lior Wolf

Blavatnik School of Computer Science, Tel Aviv University

yoavshalev@mail.tau.ac.il, wolf@cs.tau.ac.il

## A. Architecture

Following [1], the mask generator  $m$ , the mask refinement network  $r$  and the high-res generator  $h$  have the same encoder-decoder architecture, followed by a  $conv_{7\times 7}$  layer and a *sigmoid* activation. The encoder (decoder) consists of five encoding (decoding) blocks, where each encoding block is a sequence of  $conv_{3\times 3} - relu - batch\_norm - avg\_pool_{2\times 2}$ , and each decoding block is a sequence of  $up\_sample_{2\times 2} - conv_{3\times 3} - batch\_norm - relu$ . Only for the high-res generator  $h$  we add skip connections from each of the encoding layers to its corresponding decoding layer, to form a U-Net architecture.

The encoder of the low-res generator  $\ell$  consists of  $conv_{7\times 7} - batch\_norm - relu$ , followed by six residual blocks, each block consists of  $batch\_norm - relu - conv_{3\times 3} - batch\_norm - relu - conv_{3\times 3}$ . The decoder consists of two blocks, each is a sequence of  $up\_sample_{2\times 2} - conv_{3\times 3} - batch\_norm - relu$ . The decoder is followed by a  $conv_{7\times 7}$  layer and a *sigmoid* activation.

## B. Additional Qualitative Results

In Fig. 1, Fig. 2 and Fig. 3 we added final and intermediate results generated by our method for the VoxCeleb, Tai-Chi-HD and BAIR datasets, compared to the SOTA methods. The full videos are available at <https://github.com/itsyoavshalev/Image-Animation-with-Perturbed-Masks>.

## References

- [1] Aliaksandr Siarohin, Stéphane Lathuilière, Sergey Tulyakov, Elisa Ricci, and Nicu Sebe. First order motion model for image animation. In *Advances in Neural Information Processing Systems*, pages 7137–7147, 2019. 1

Figure 1. Final and intermediate results generated by our method for VoxCeleb, compared to the SOTA methods.

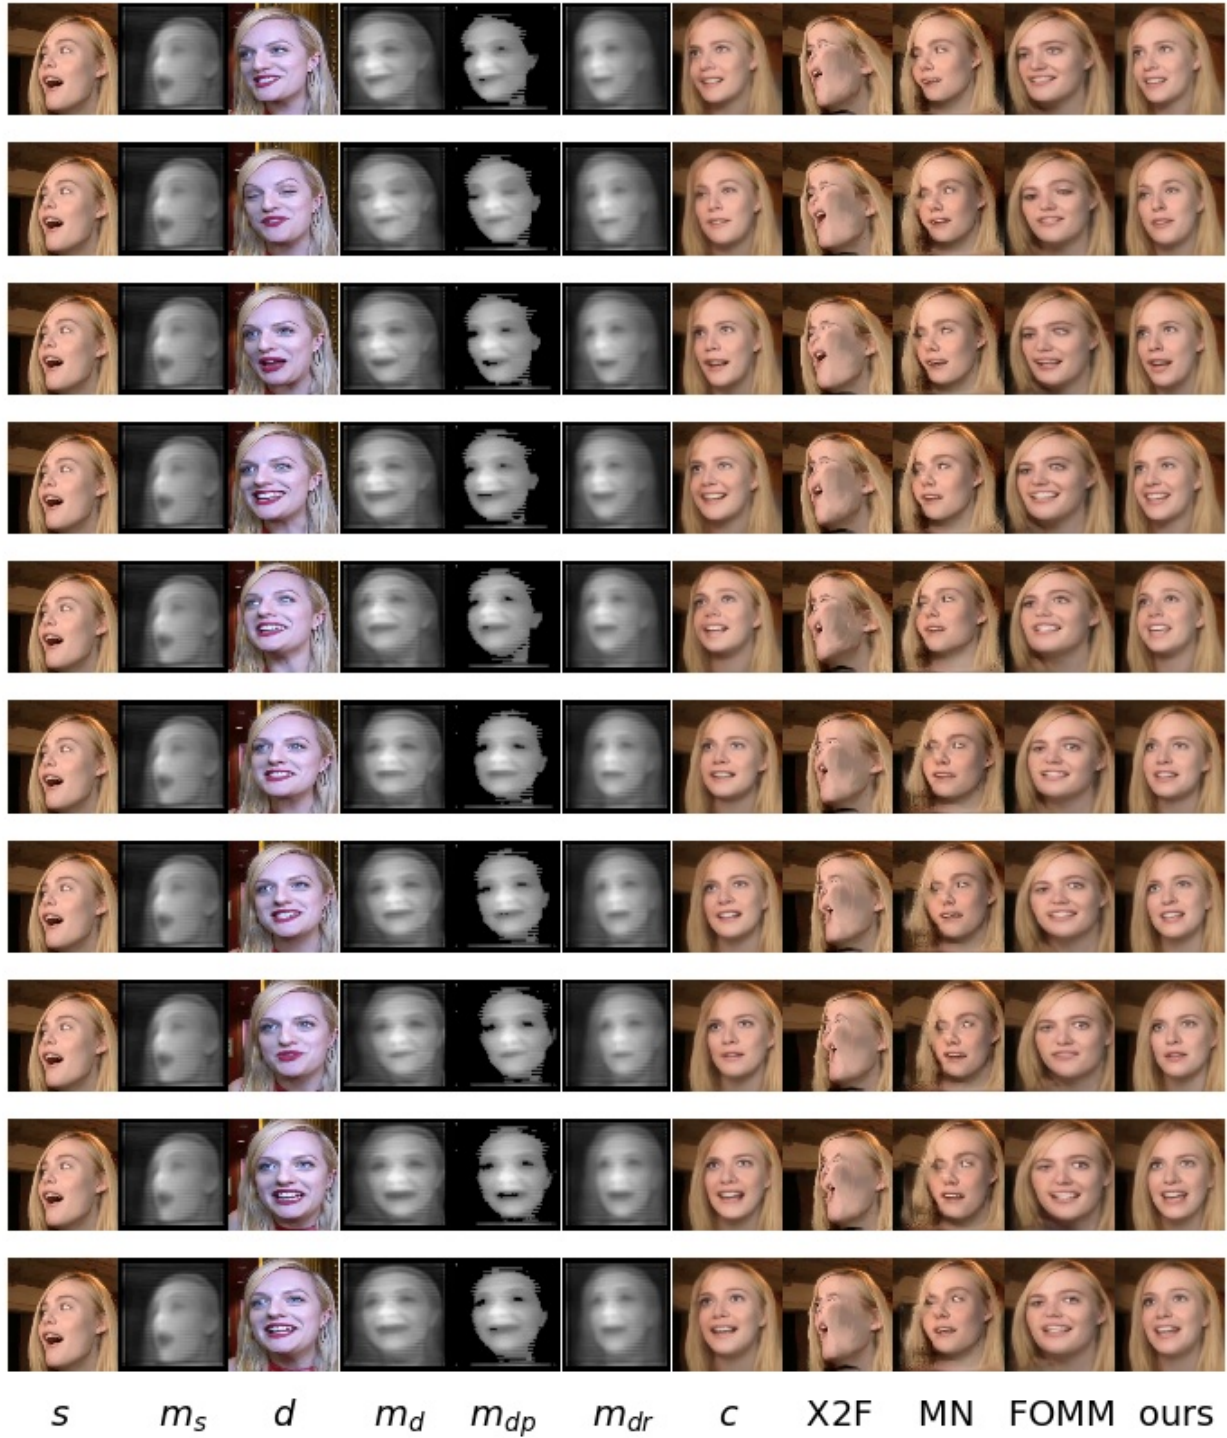

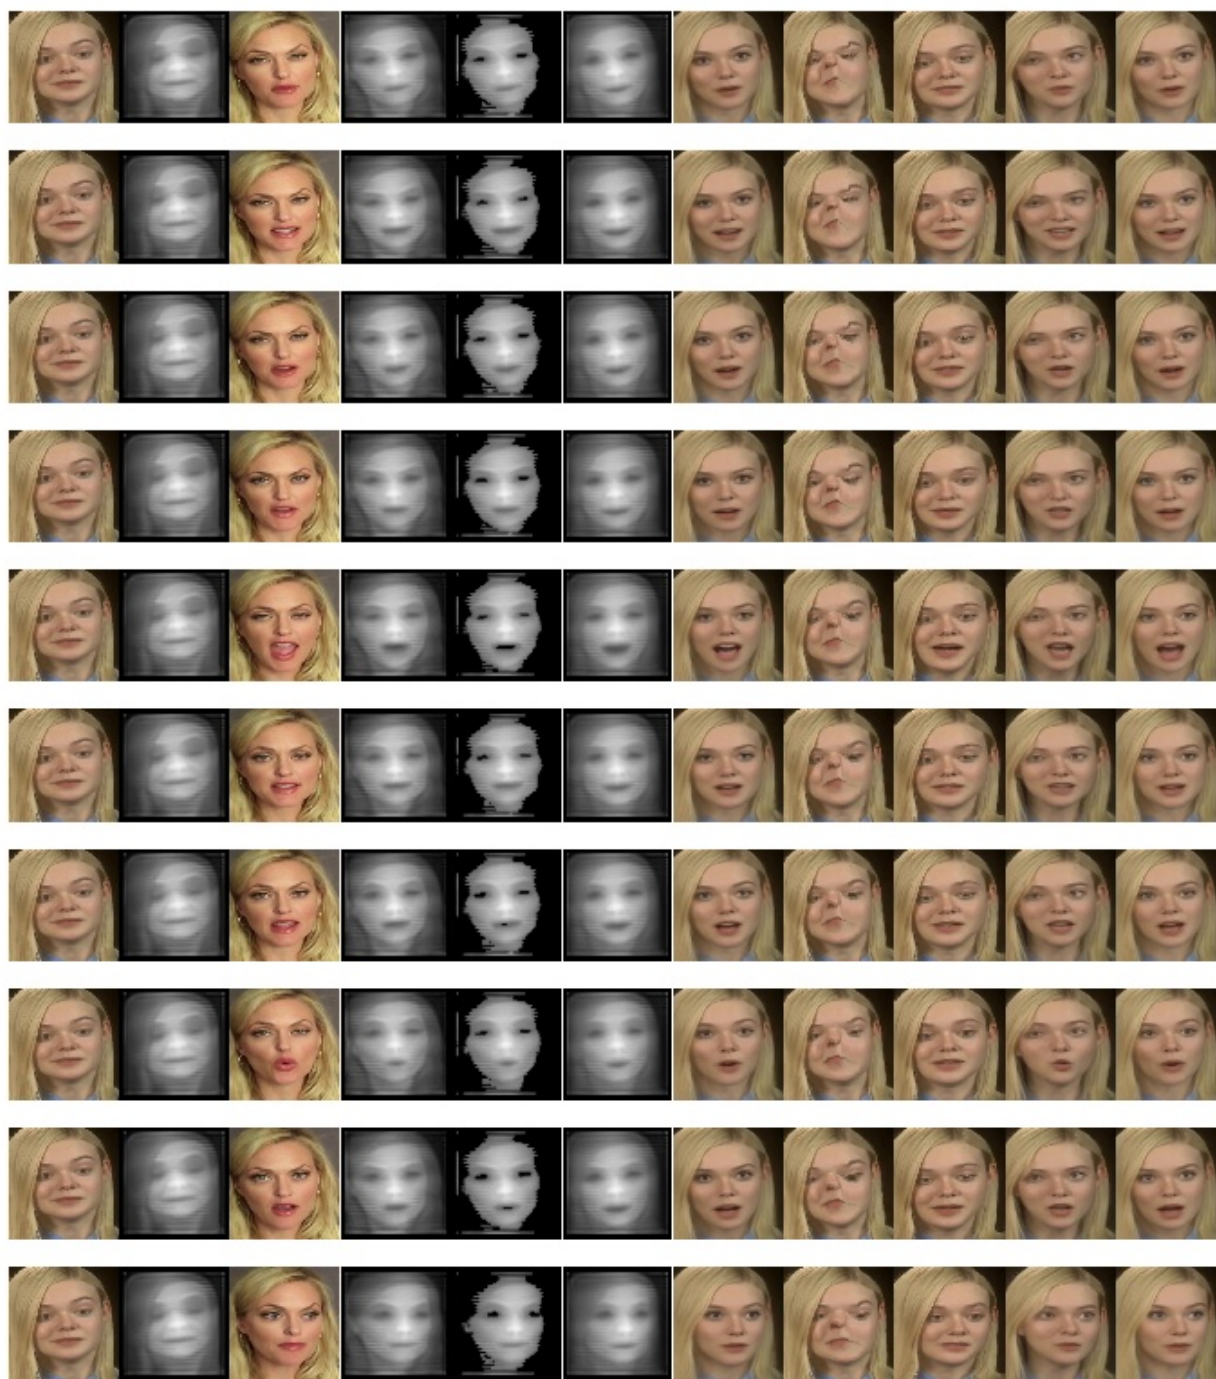

*s*    *m<sub>s</sub>*    *d*    *m<sub>d</sub>*    *m<sub>dp</sub>*    *m<sub>dr</sub>*    *c*    X2F    MN    FOMM    ours

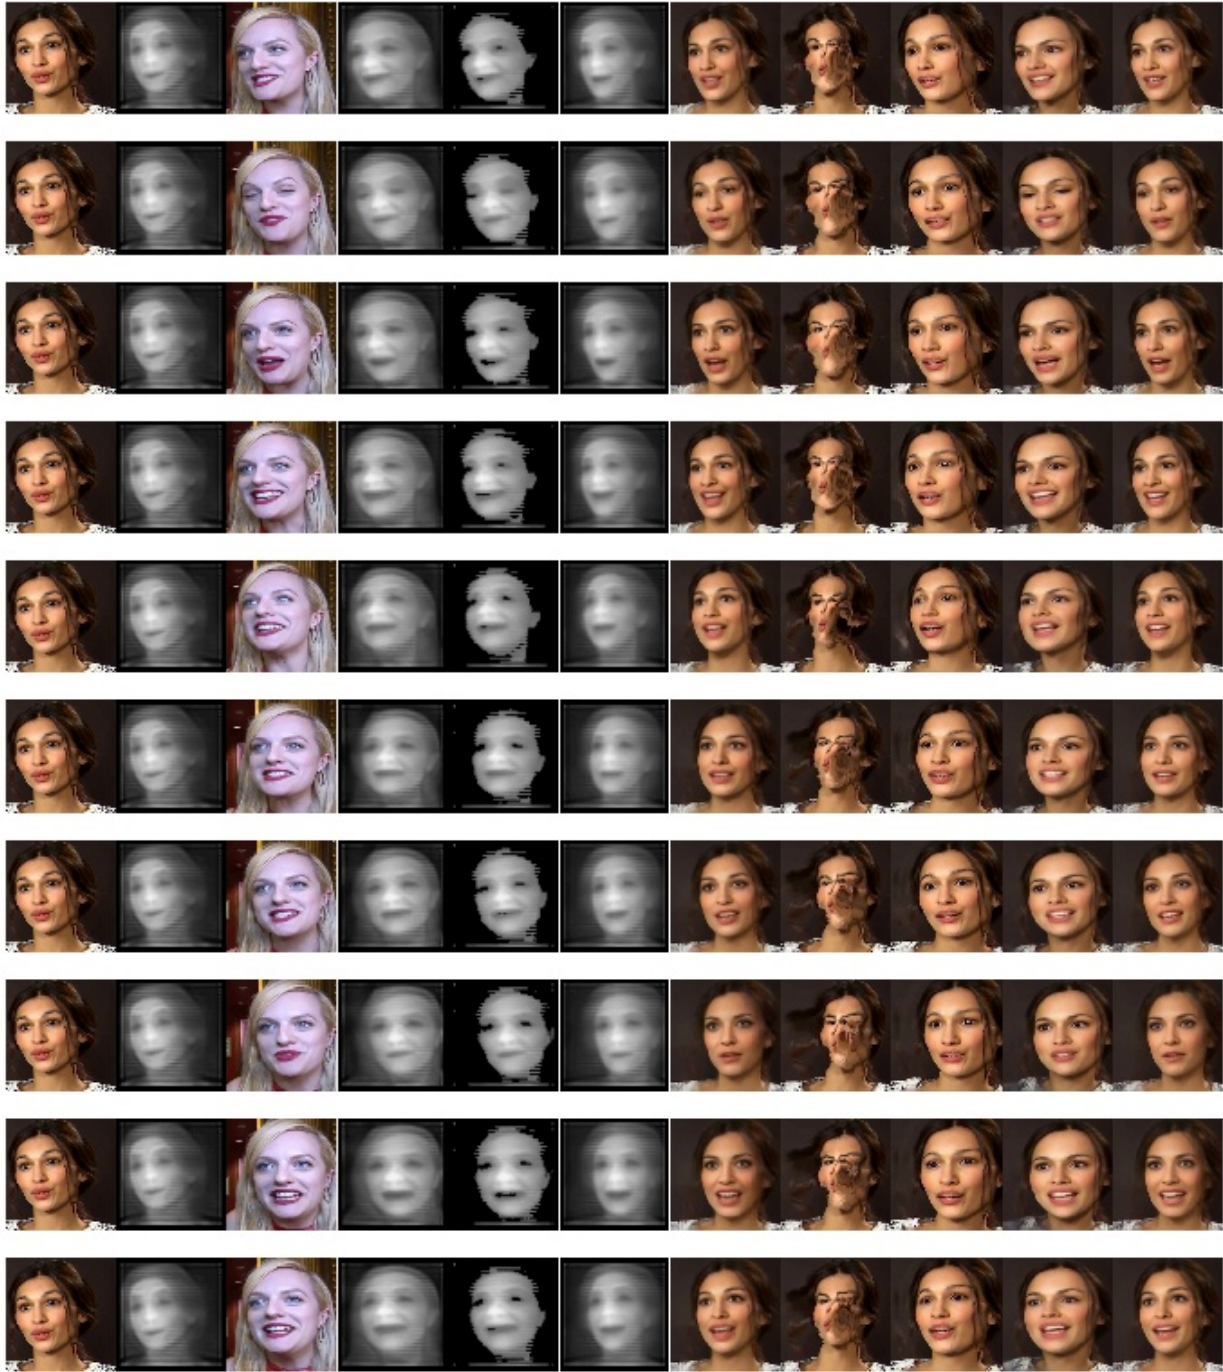

*s*    *m<sub>s</sub>*    *d*    *m<sub>d</sub>*    *m<sub>dp</sub>*    *m<sub>dr</sub>*    *c*    X2F    MN    FOMM    ours

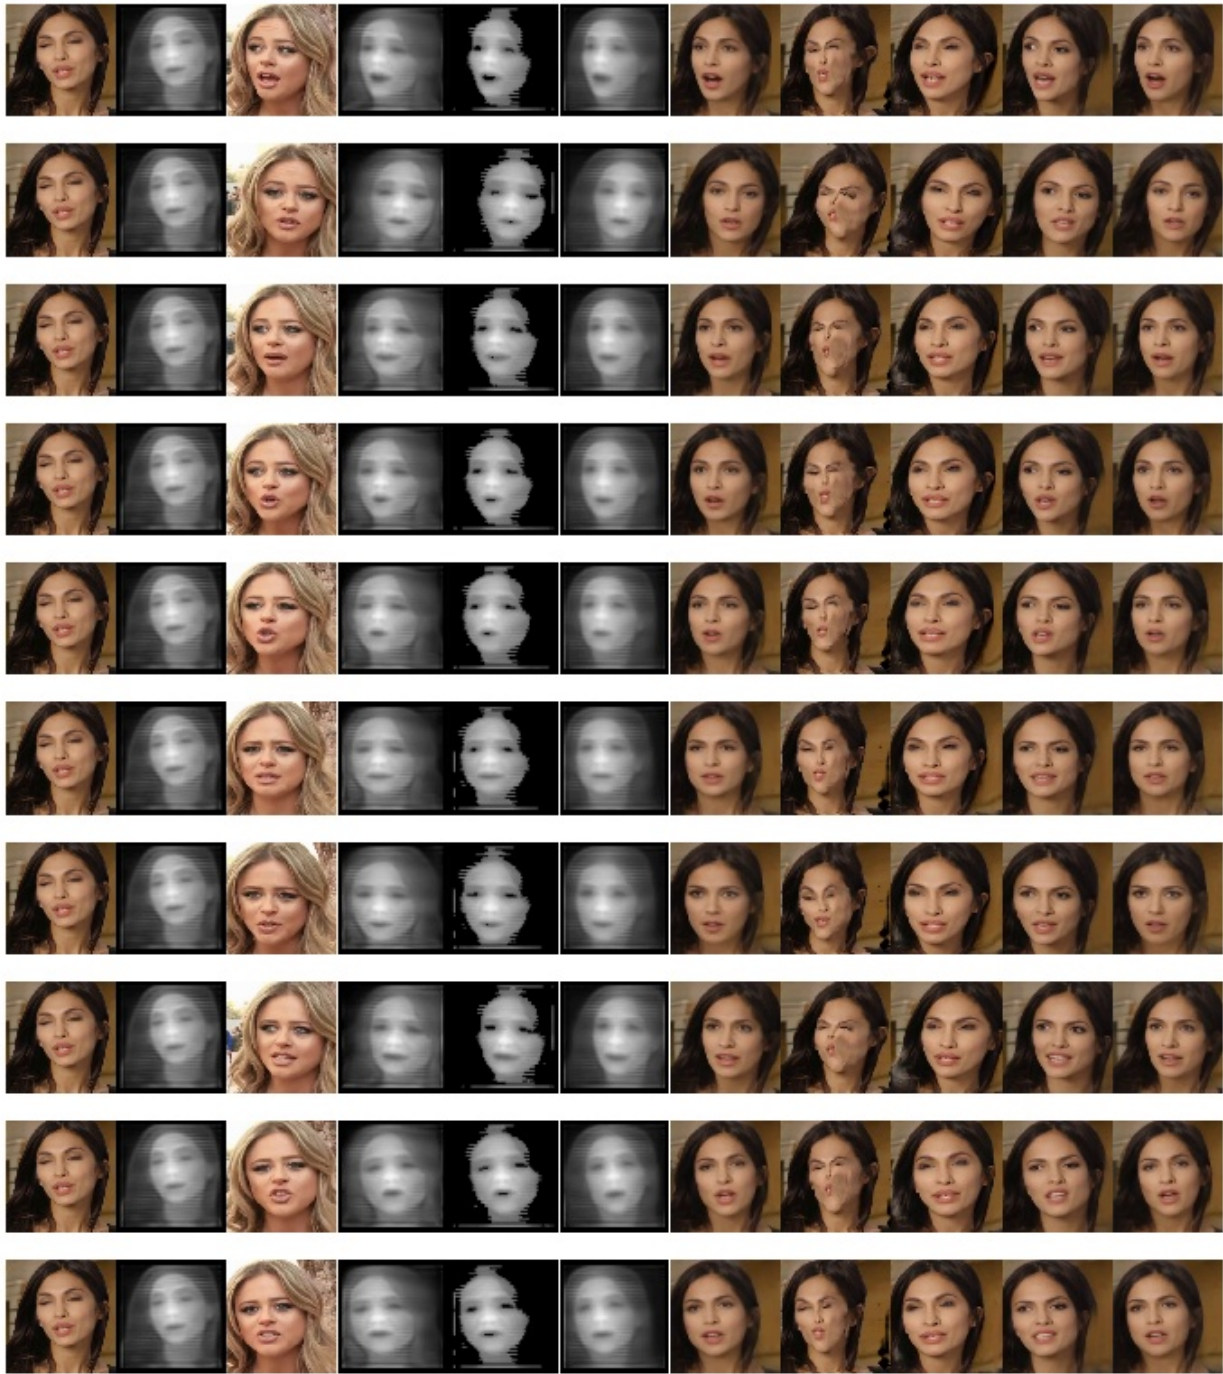

*s*    *m<sub>s</sub>*    *d*    *m<sub>d</sub>*    *m<sub>dp</sub>*    *m<sub>dr</sub>*    *c*    X2F    MN    FOMM    ours

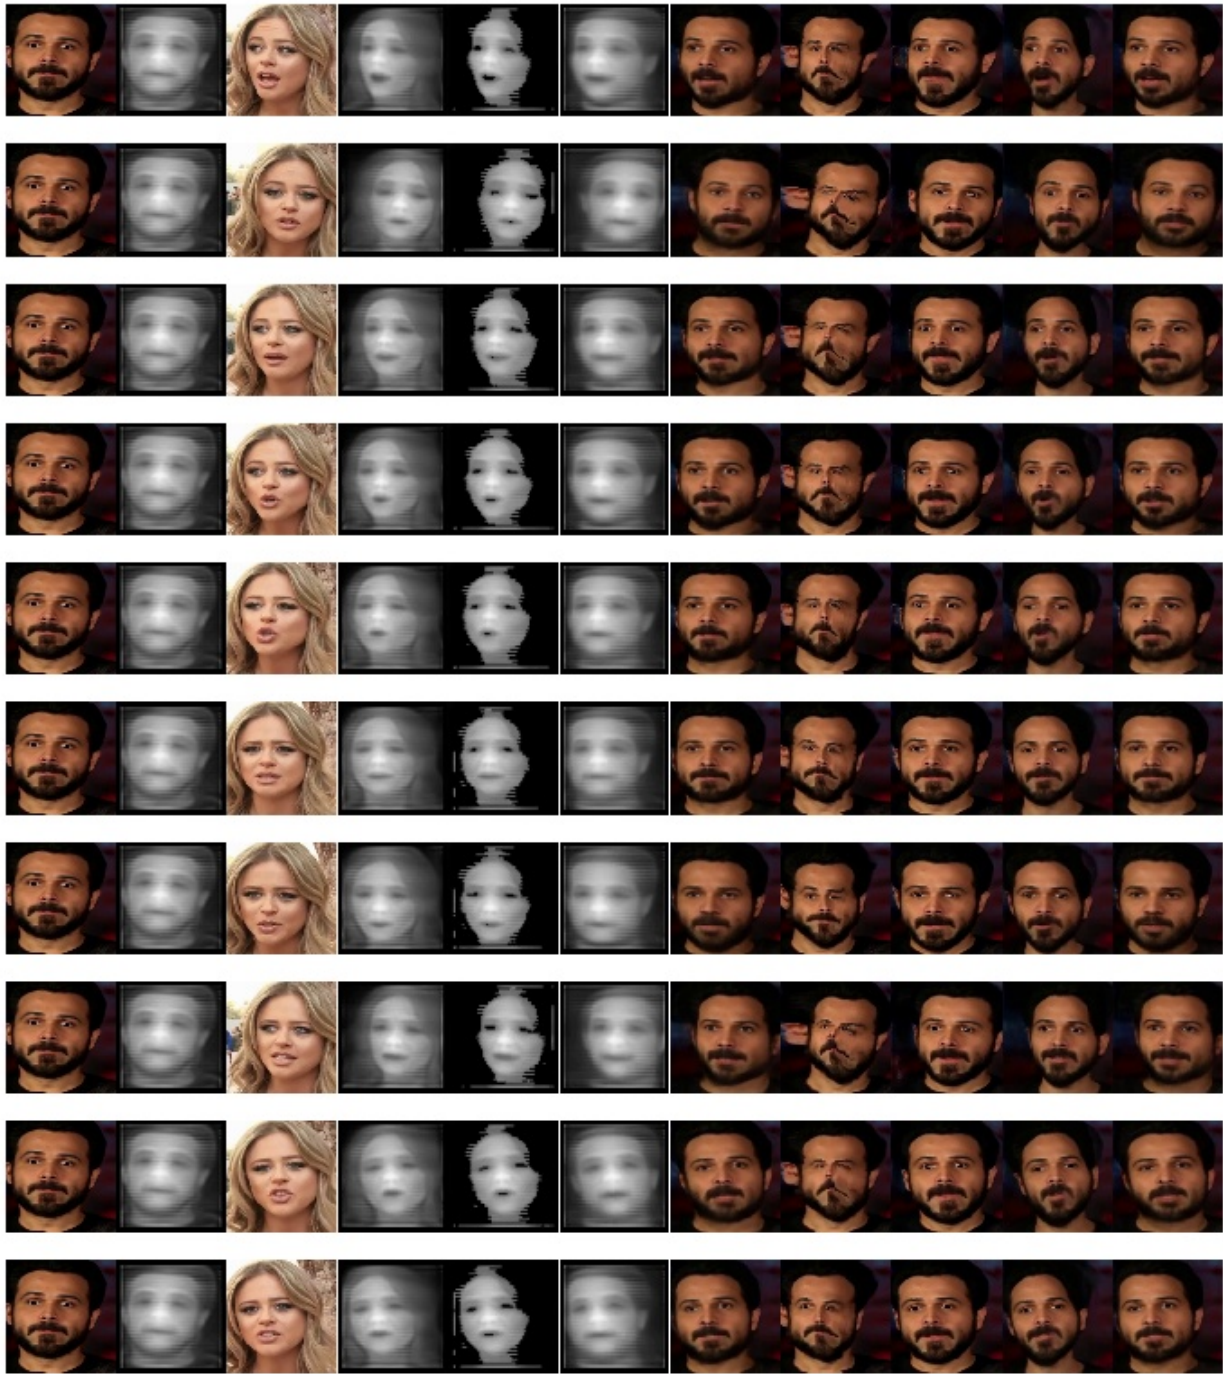

*s*    *m<sub>s</sub>*    *d*    *m<sub>d</sub>*    *m<sub>dp</sub>*    *m<sub>dr</sub>*    *c*    X2F    MN    FOMM    ours

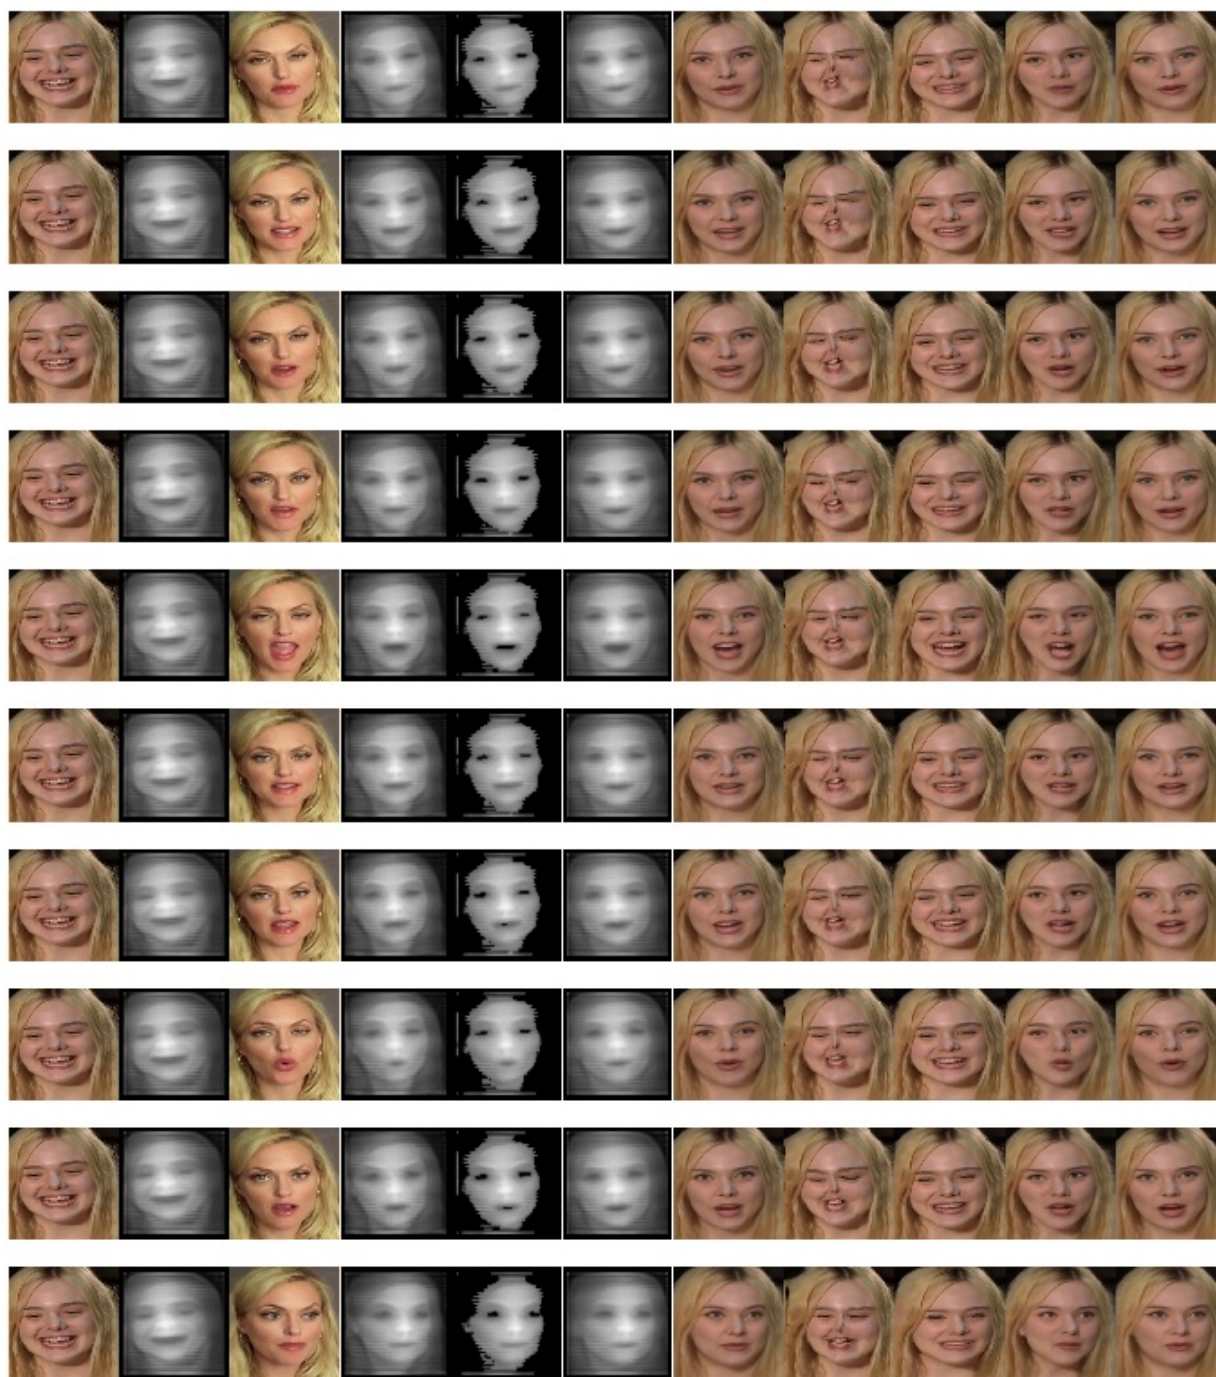

*s*    *m<sub>s</sub>*    *d*    *m<sub>d</sub>*    *m<sub>dp</sub>*    *m<sub>dr</sub>*    *c*    X2F    MN    FOMM    ours

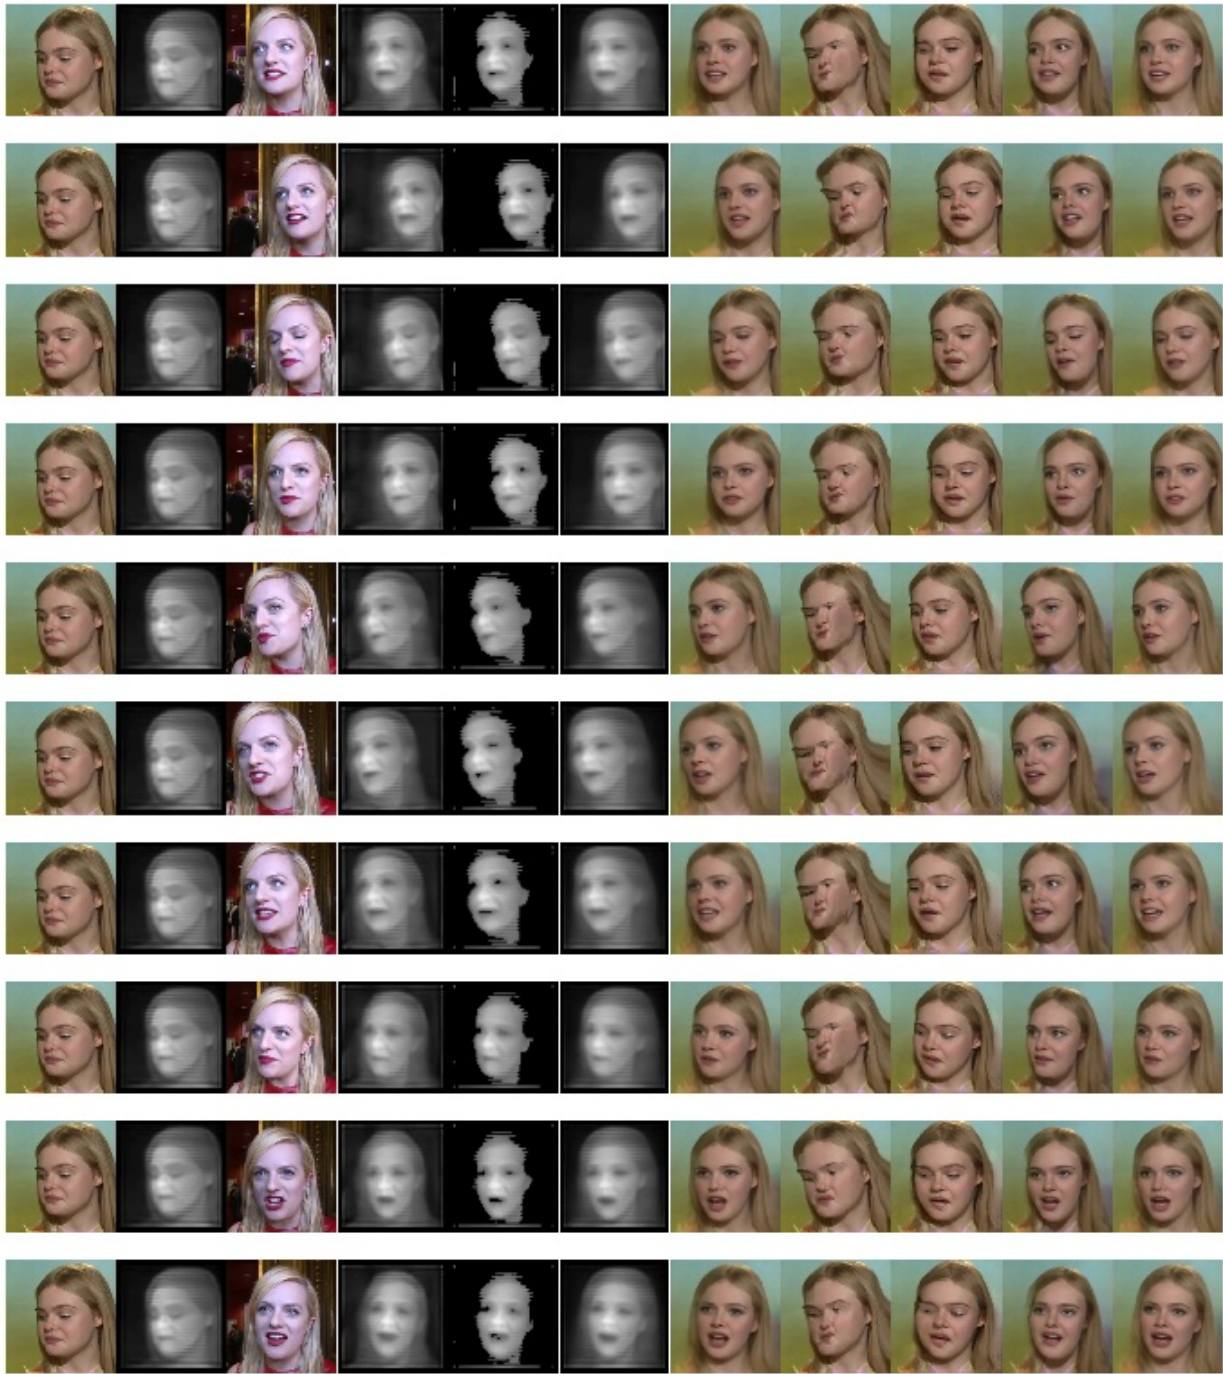

*s*   *m<sub>s</sub>*   *d*   *m<sub>d</sub>*   *m<sub>dp</sub>*   *m<sub>dr</sub>*   *c*   X2F   MN   FOMM   ours



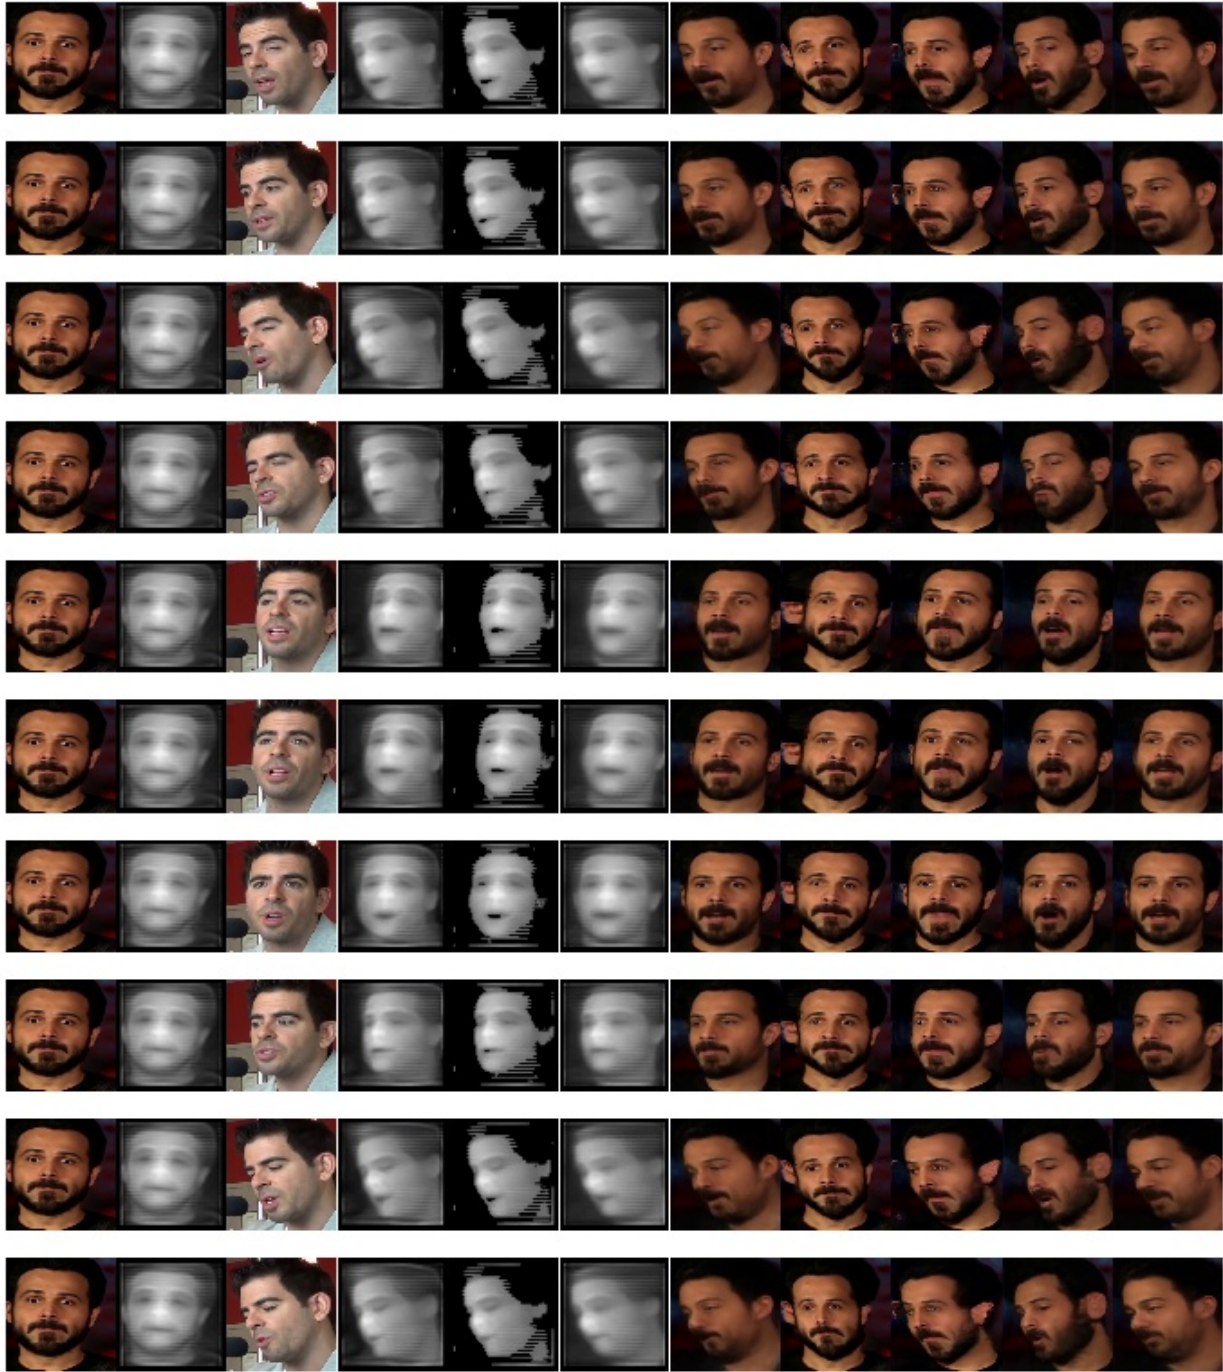

*s*    *m<sub>s</sub>*    *d*    *m<sub>d</sub>*    *m<sub>dp</sub>*    *m<sub>dr</sub>*    *c*    X2F    MN    FOMM    ours

Figure 2. Final and intermediate results generated by our method for Tai-Chi-HD, compared to the SOTA methods.

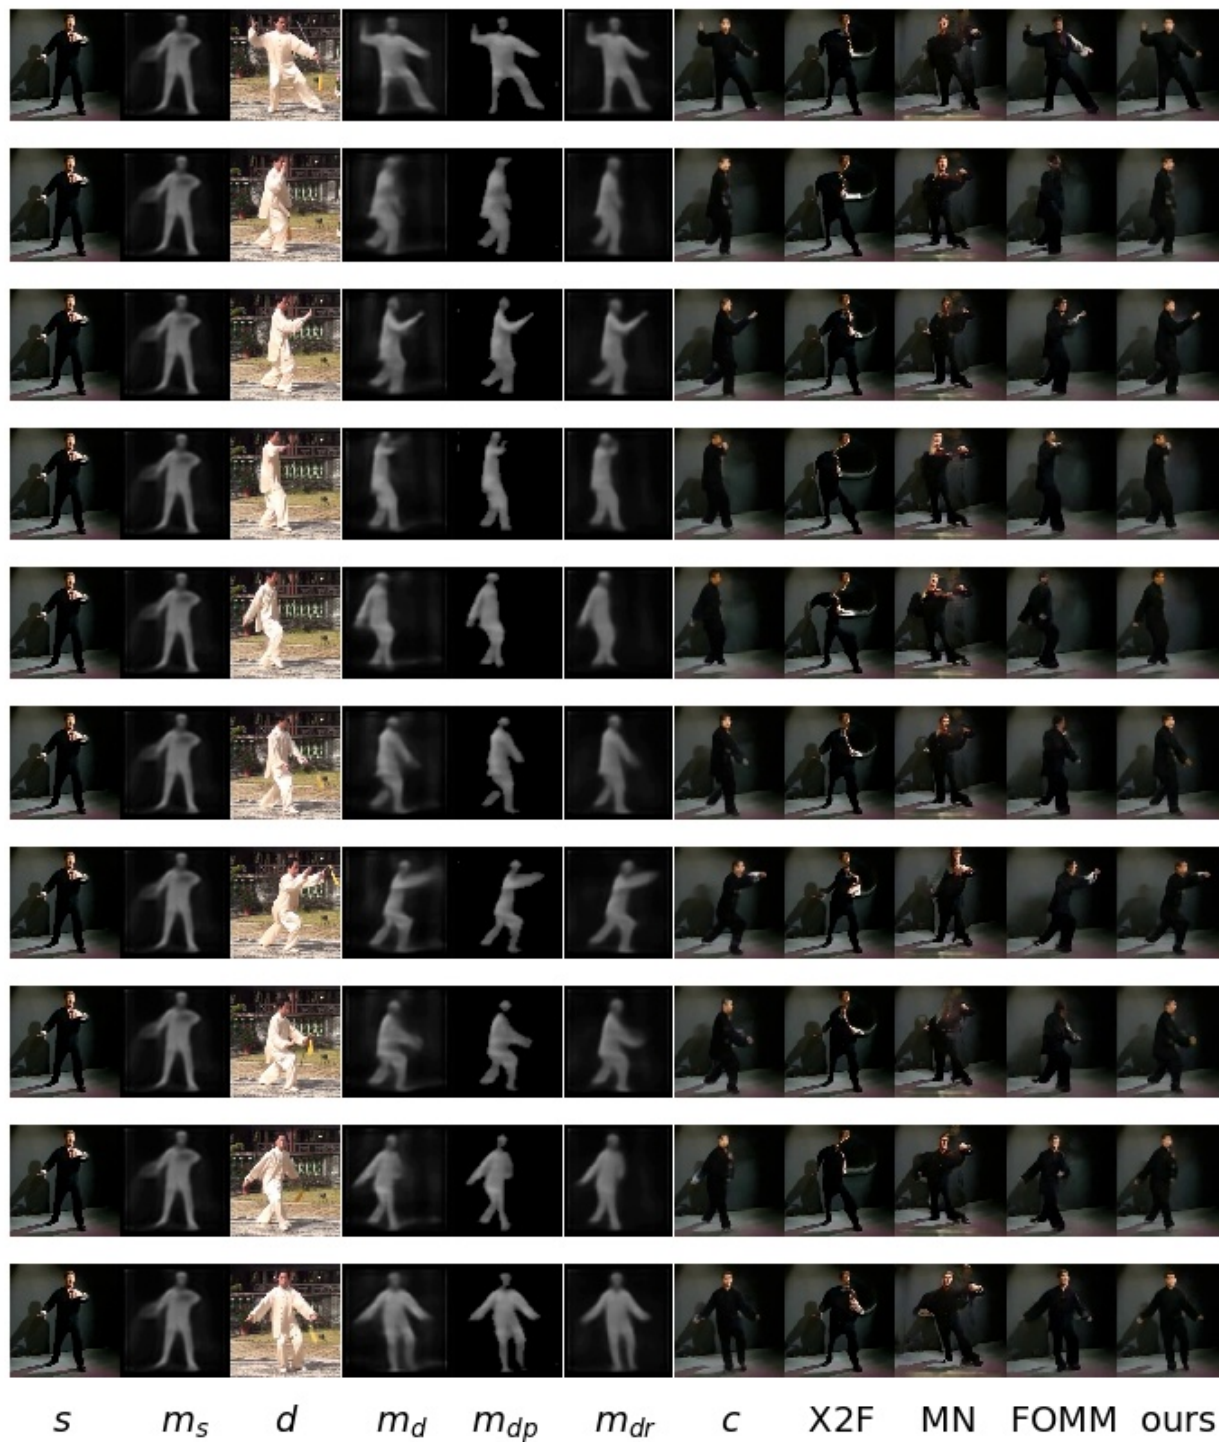

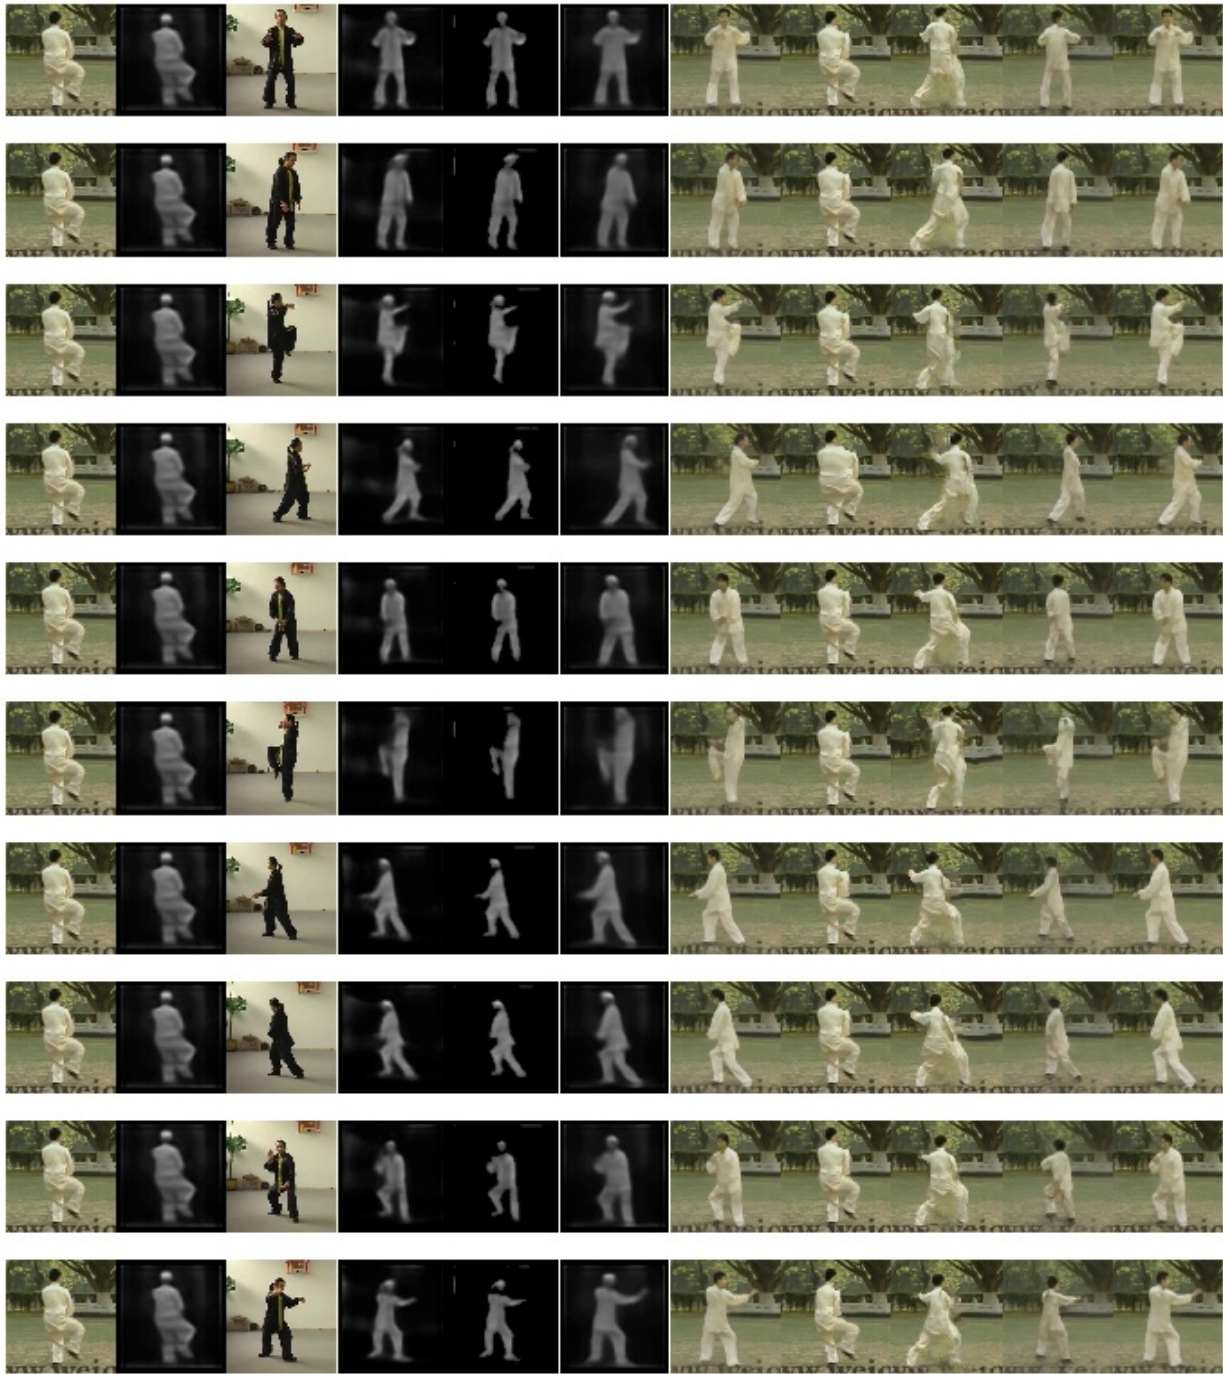

*s*    *m<sub>s</sub>*    *d*    *m<sub>d</sub>*    *m<sub>dp</sub>*    *m<sub>dr</sub>*    *c*    X2F    MN    FOMM    ours

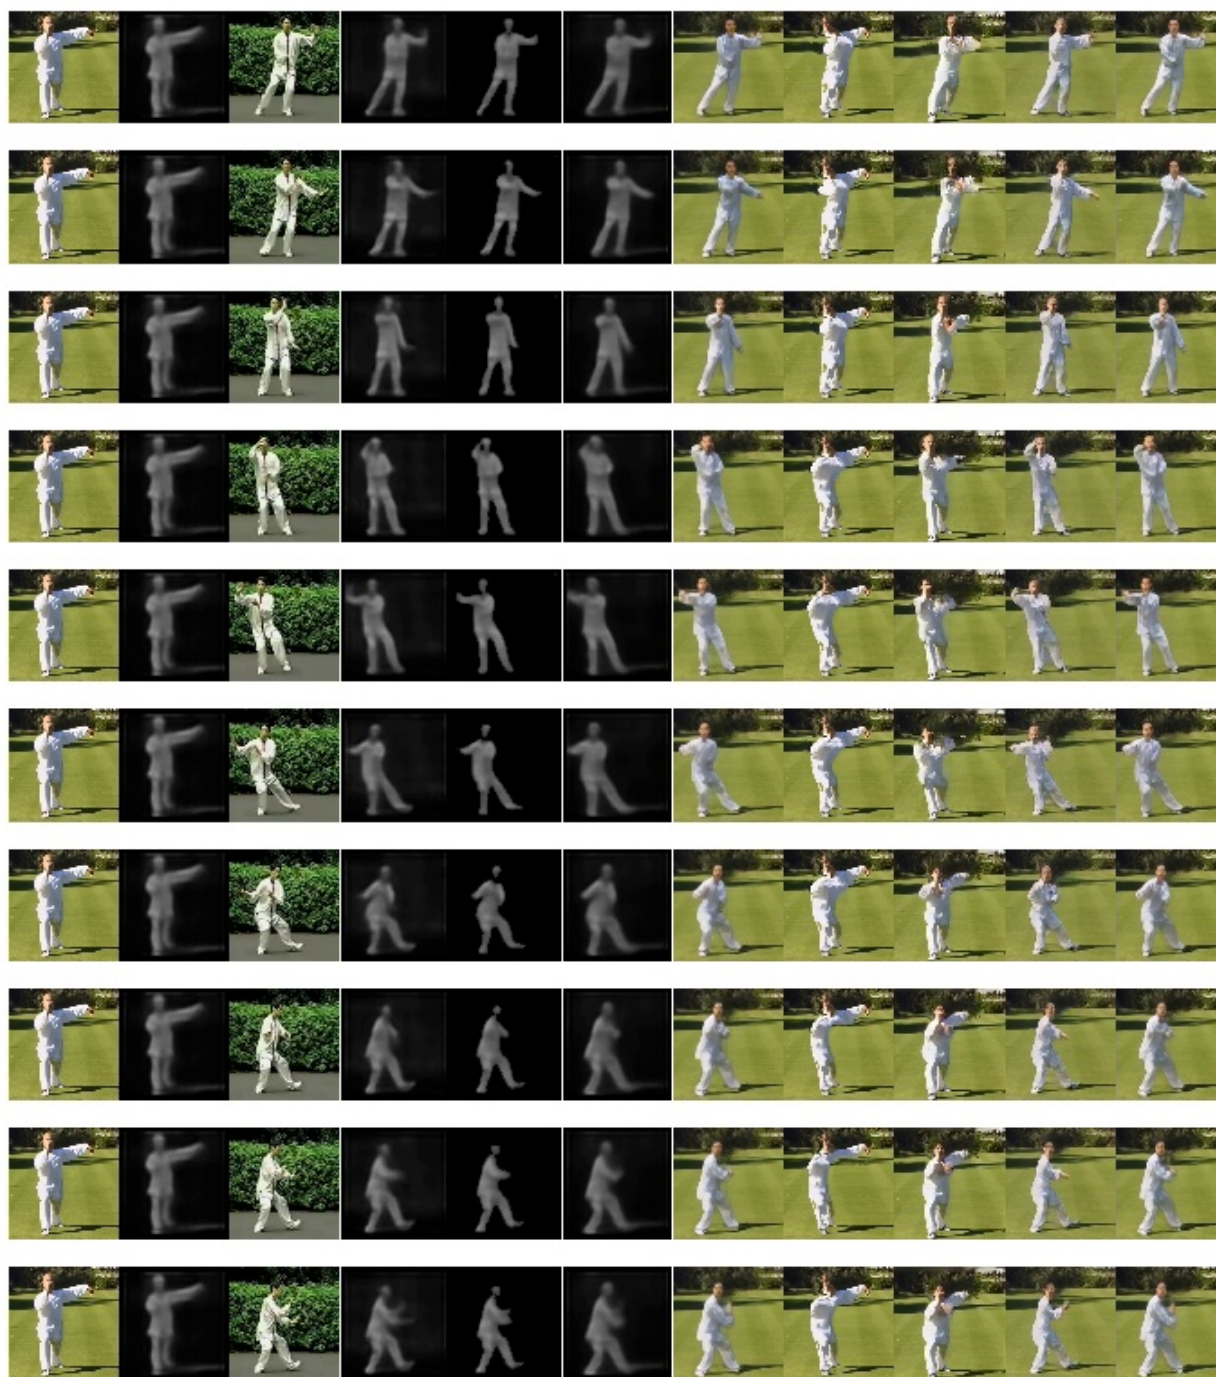

*s*    *m<sub>s</sub>*    *d*    *m<sub>d</sub>*    *m<sub>dp</sub>*    *m<sub>dr</sub>*    *c*    X2F    MN    FOMM    ours

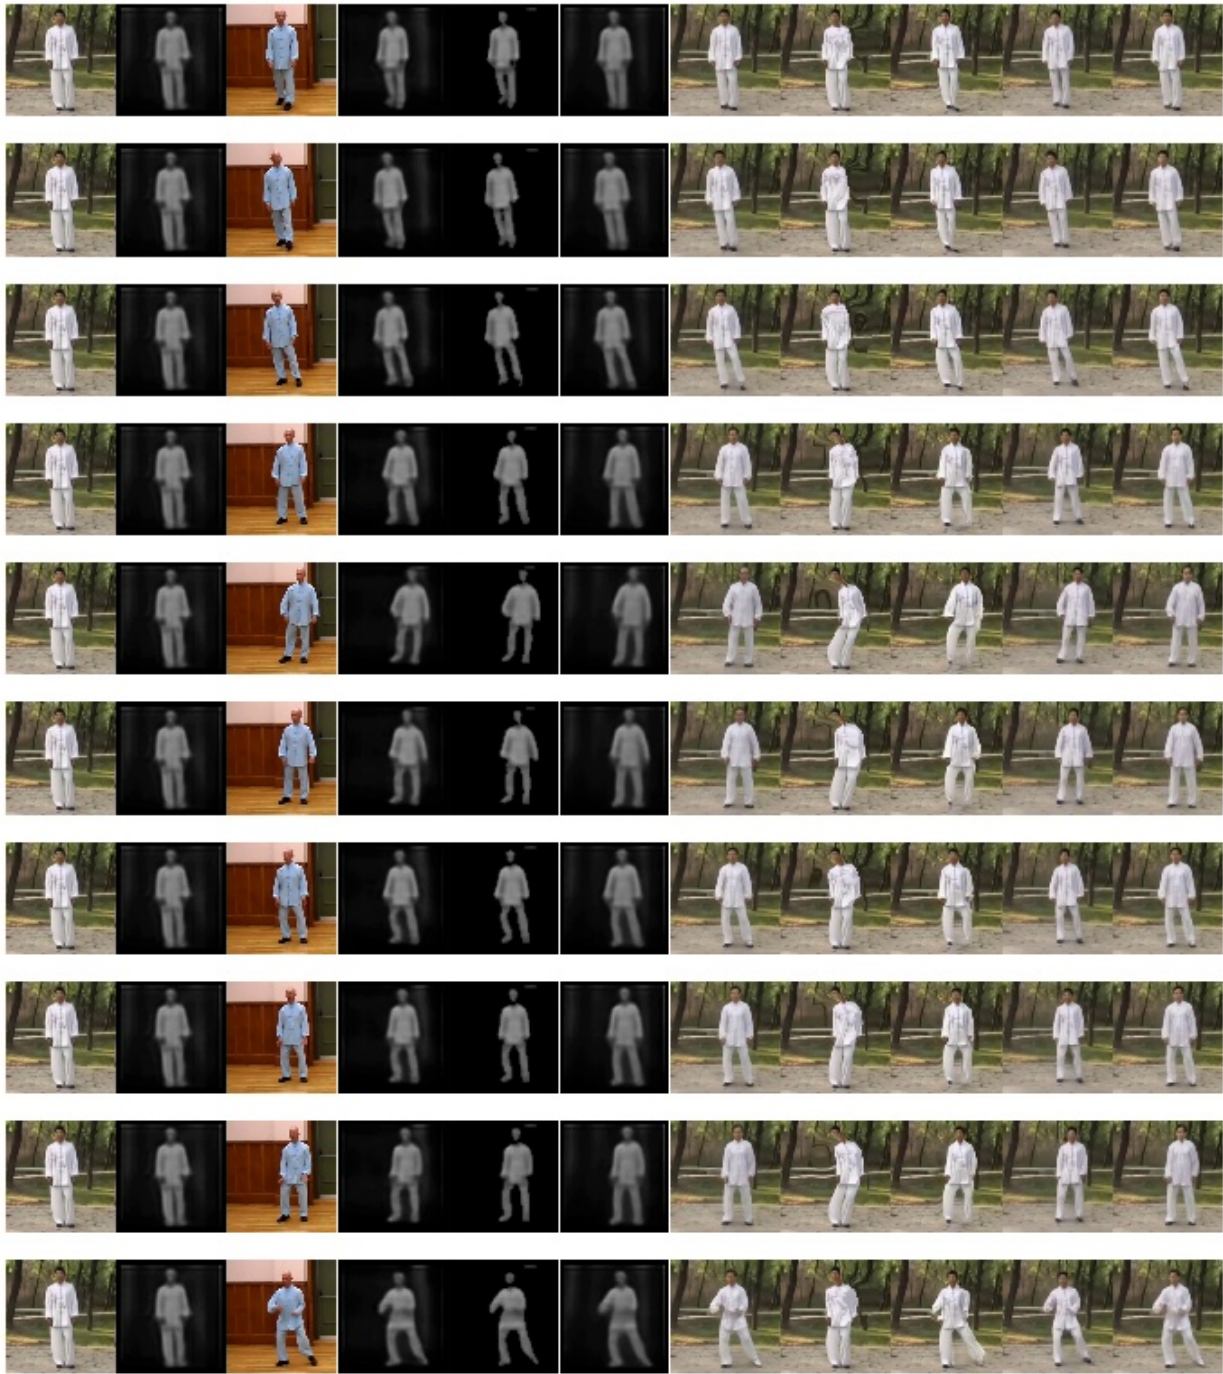

*s*    *m<sub>s</sub>*    *d*    *m<sub>d</sub>*    *m<sub>dp</sub>*    *m<sub>dr</sub>*    *c*    X2F    MN    FOMM    ours

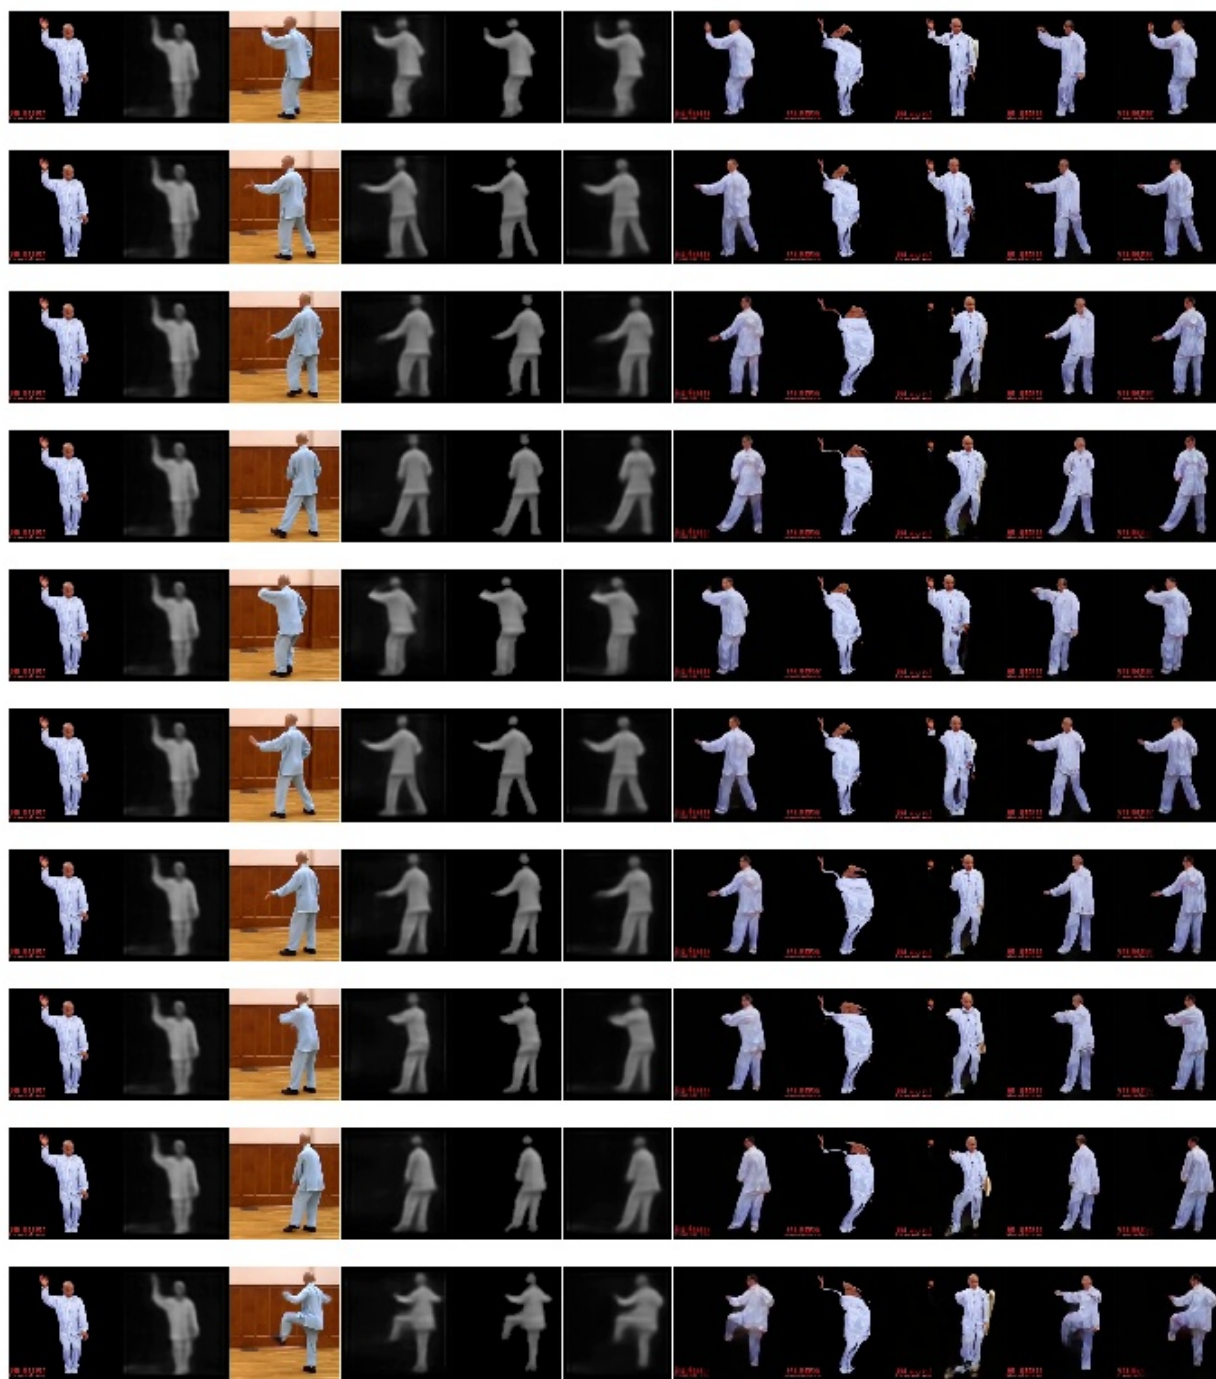

*s*     $m_s$     *d*     $m_d$      $m_{dp}$      $m_{dr}$     *c*    X2F    MN    FOMM    ours

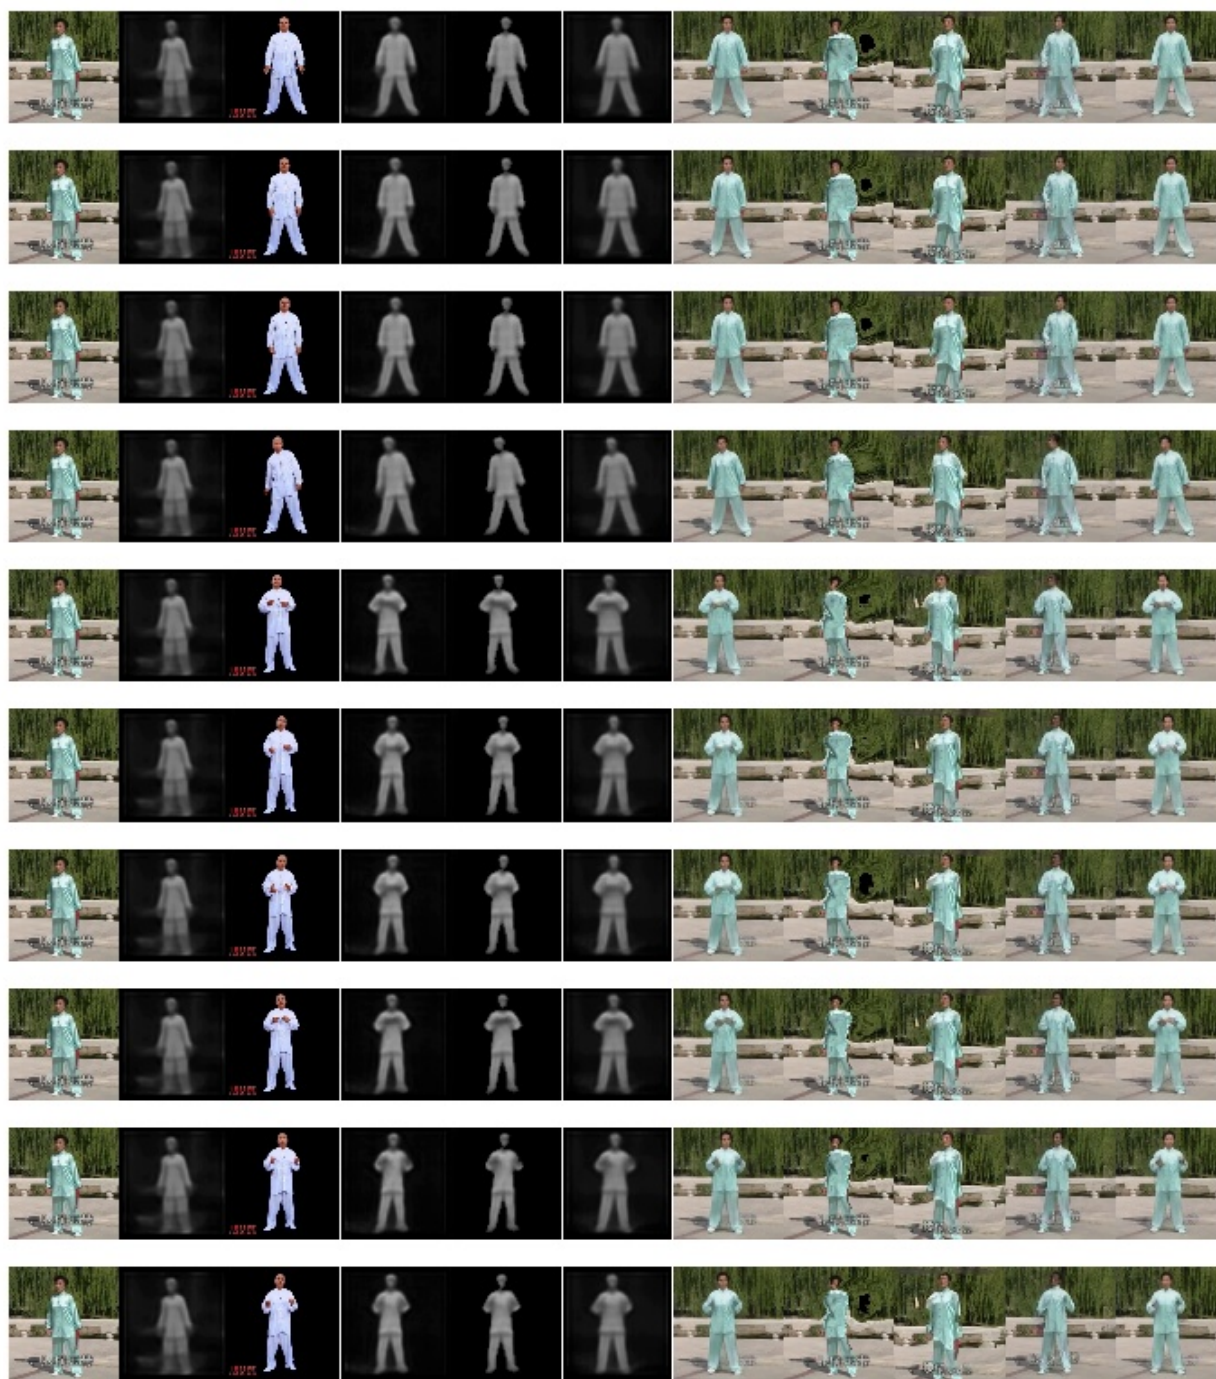

*s*     $m_s$     *d*     $m_d$      $m_{dp}$      $m_{dr}$     *c*    X2F    MN    FOMM    ours

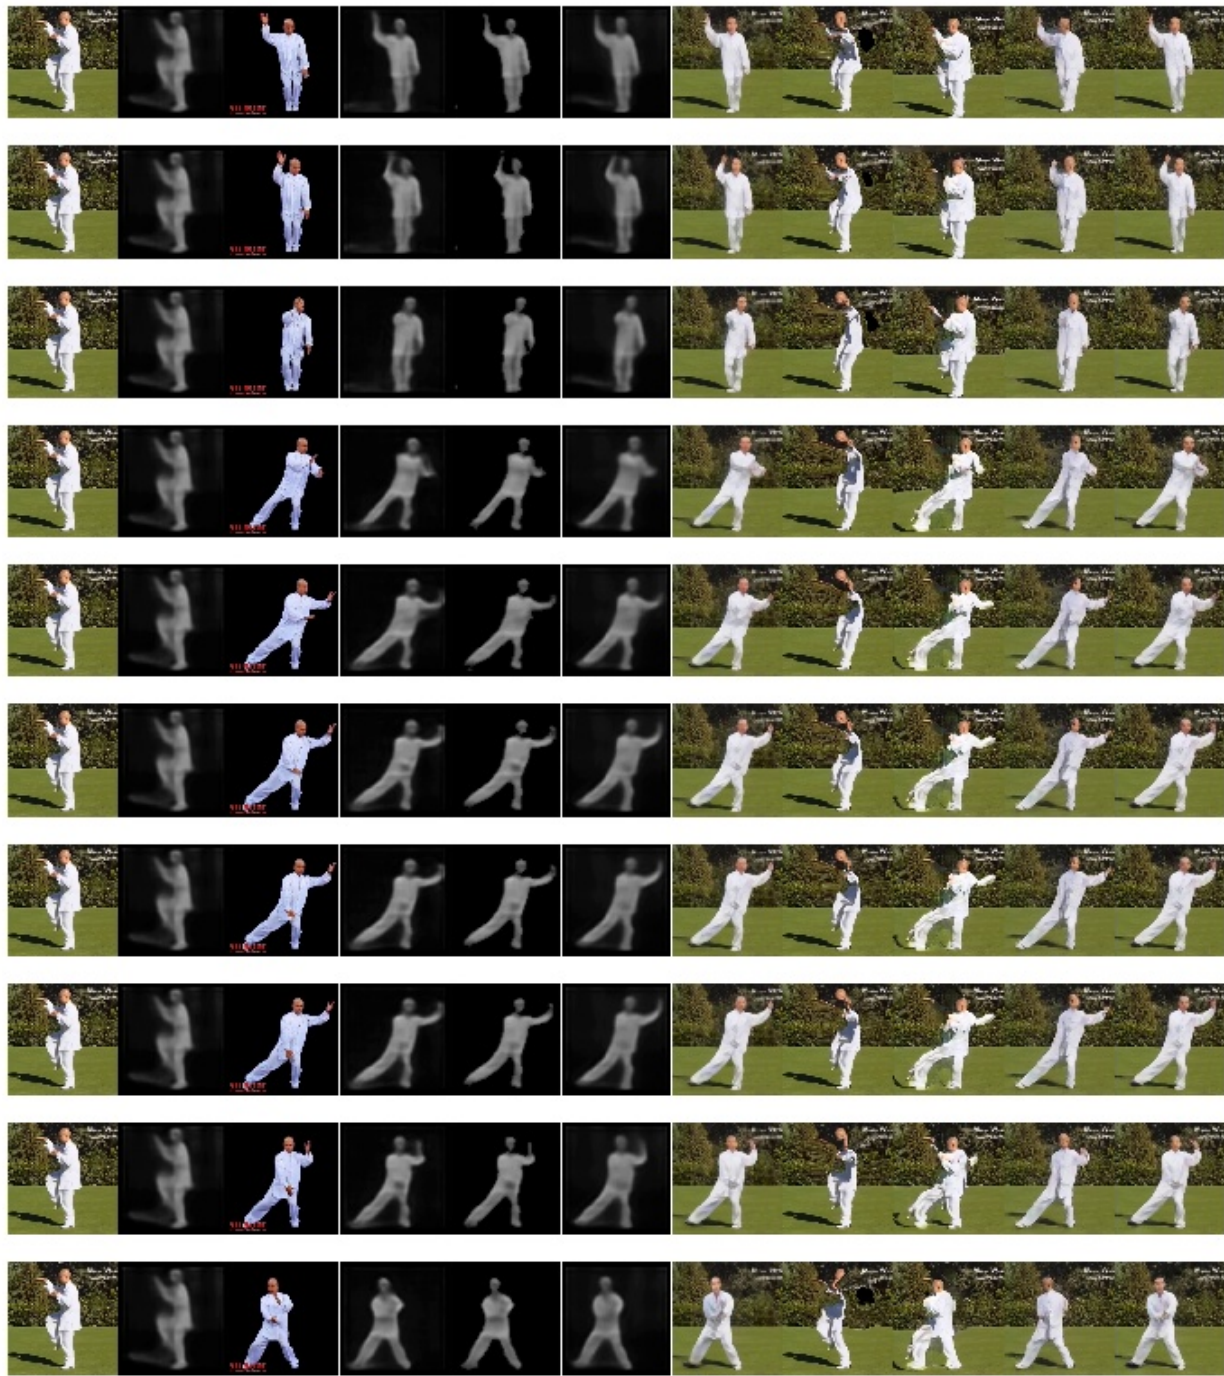

*s*    *m<sub>s</sub>*    *d*    *m<sub>d</sub>*    *m<sub>dp</sub>*    *m<sub>dr</sub>*    *c*    X2F    MN    FOMM    ours



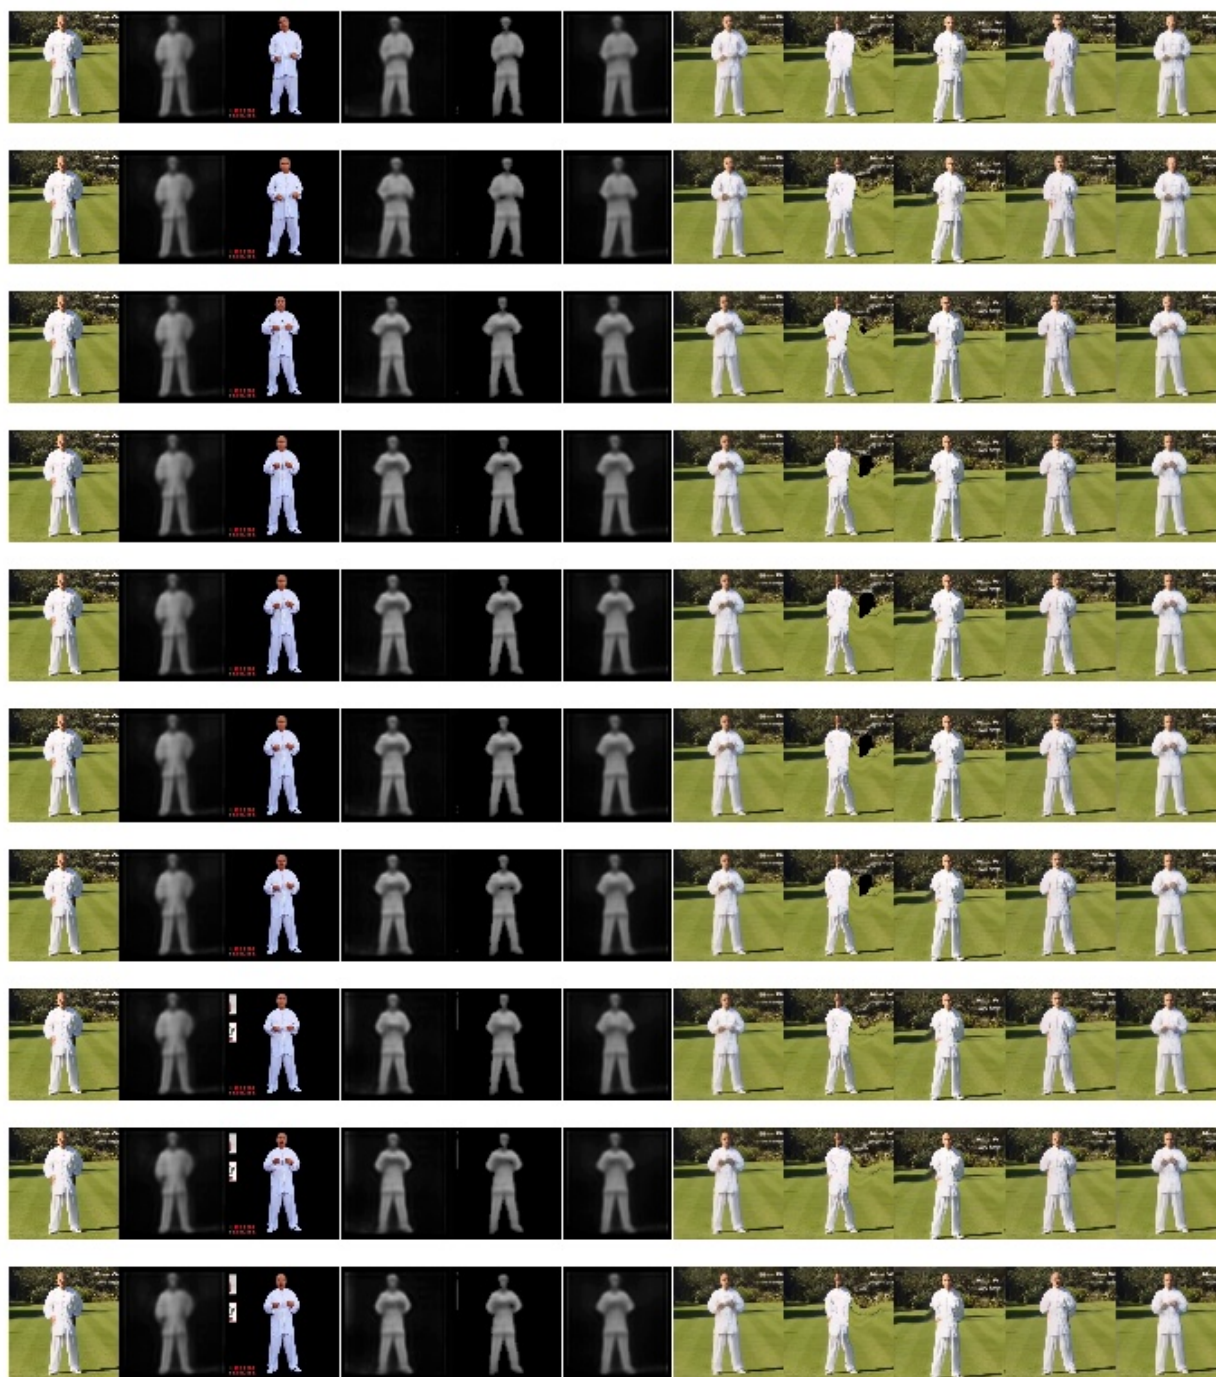

$s$     $m_s$     $d$     $m_d$     $m_{dp}$     $m_{dr}$     $c$    X2F   MN   FOMM   ours

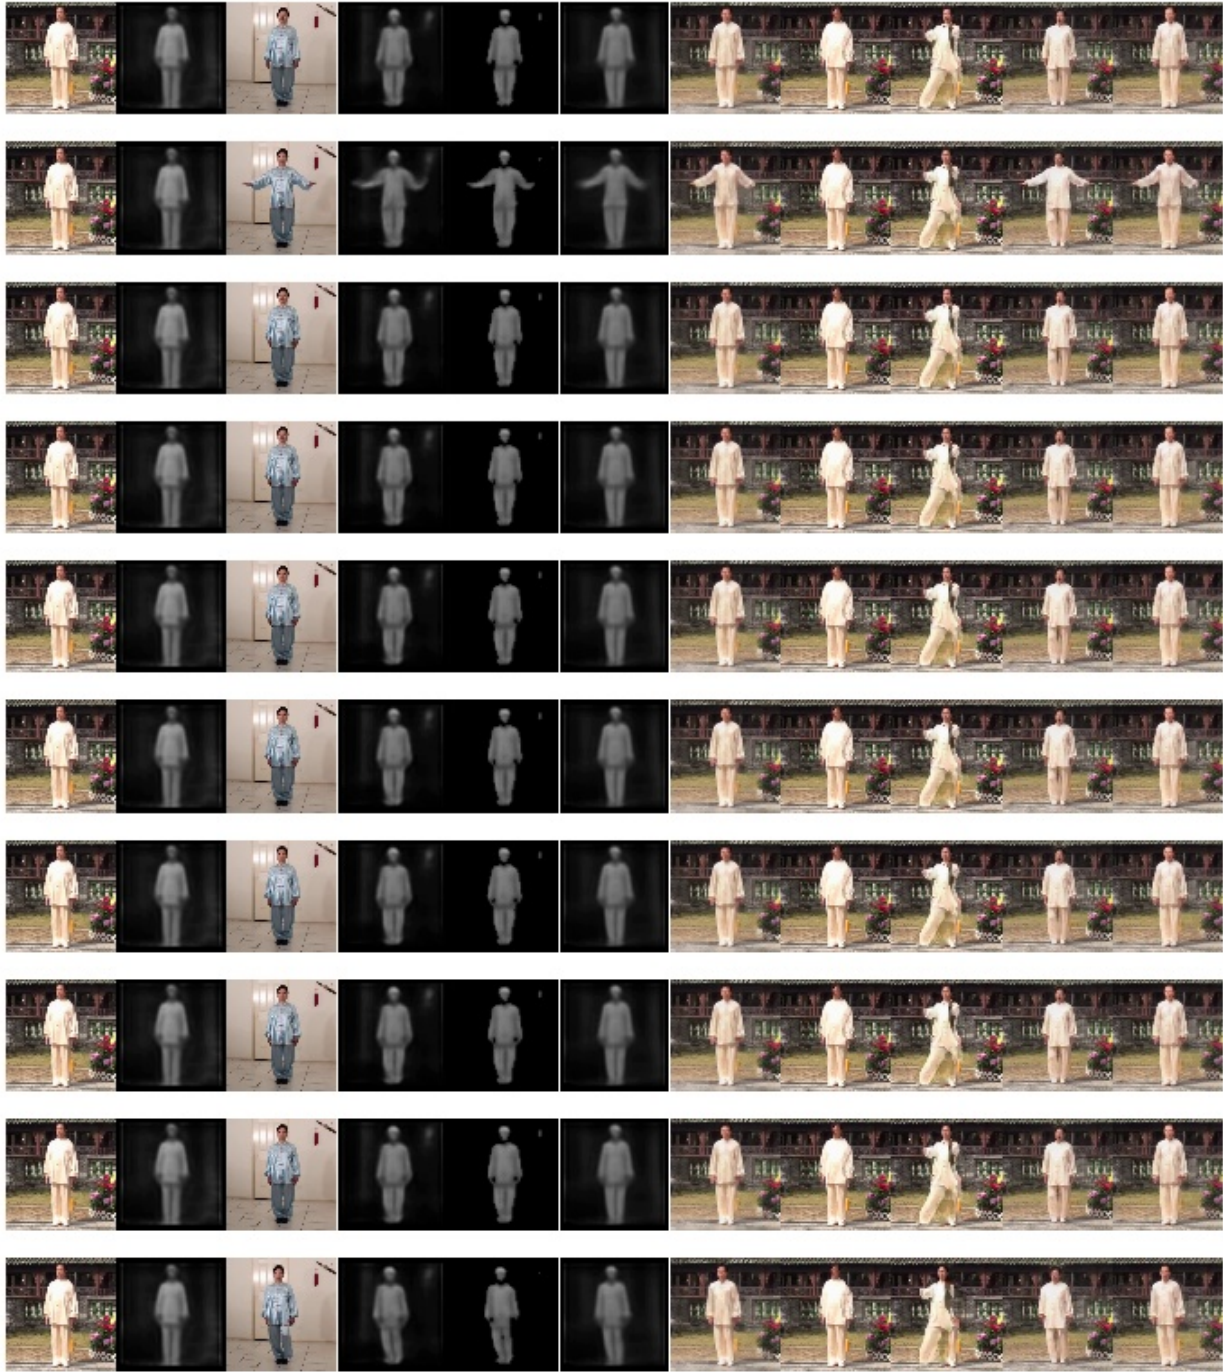

$s$     $m_s$     $d$     $m_d$     $m_{dp}$     $m_{dr}$     $c$    X2F   MN   FOMM   ours

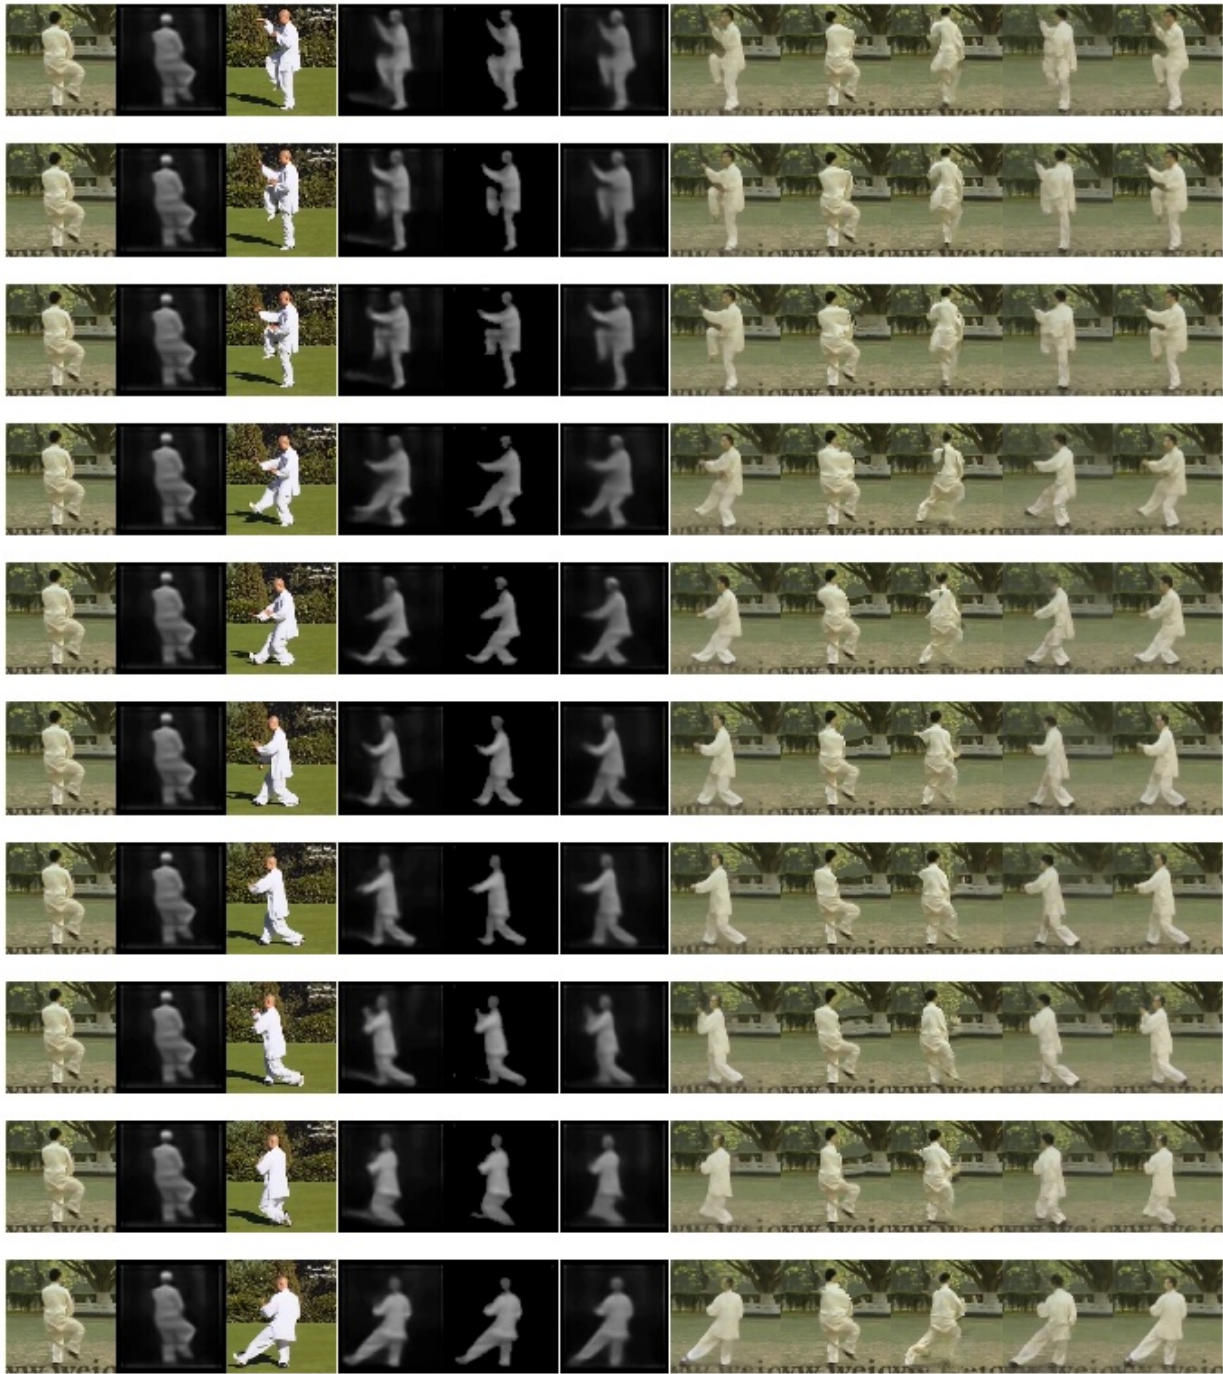

*s*    *m<sub>s</sub>*    *d*    *m<sub>d</sub>*    *m<sub>dp</sub>*    *m<sub>dr</sub>*    *c*    X2F    MN    FOMM    ours

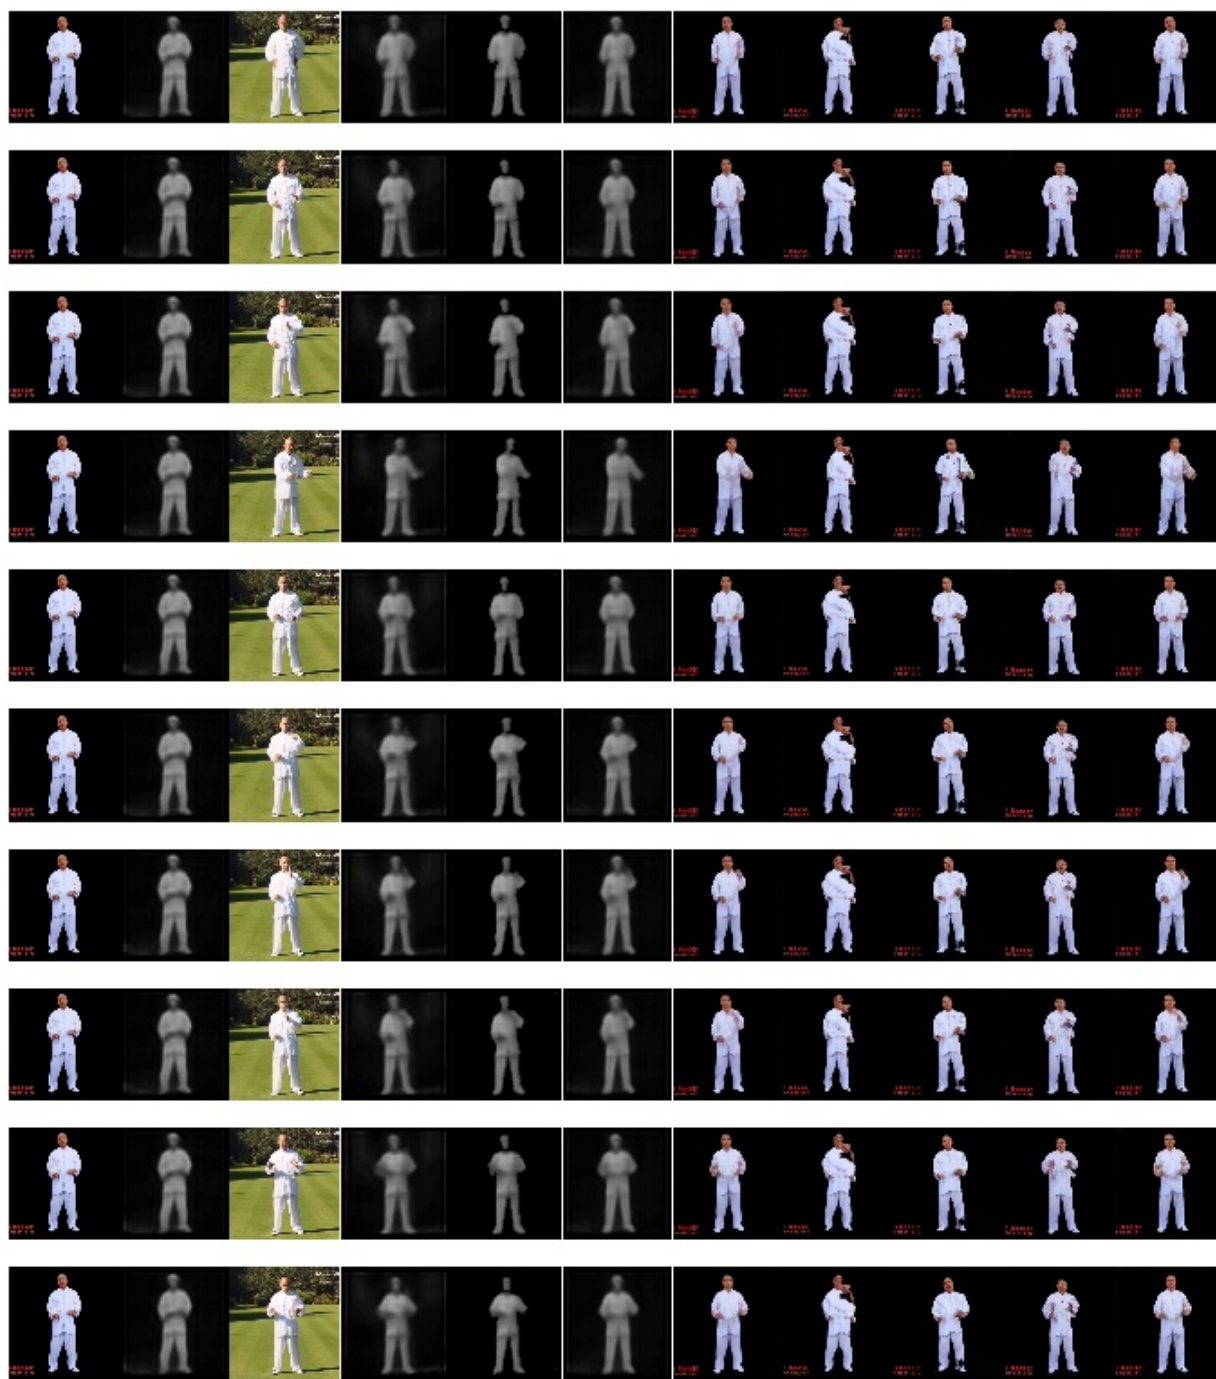

*s*    *m<sub>s</sub>*    *d*    *m<sub>d</sub>*    *m<sub>dp</sub>*    *m<sub>dr</sub>*    *c*    X2F    MN    FOMM    ours

Figure 3. Final and intermediate results generated by our method for BAIR, compared to the SOTA methods.

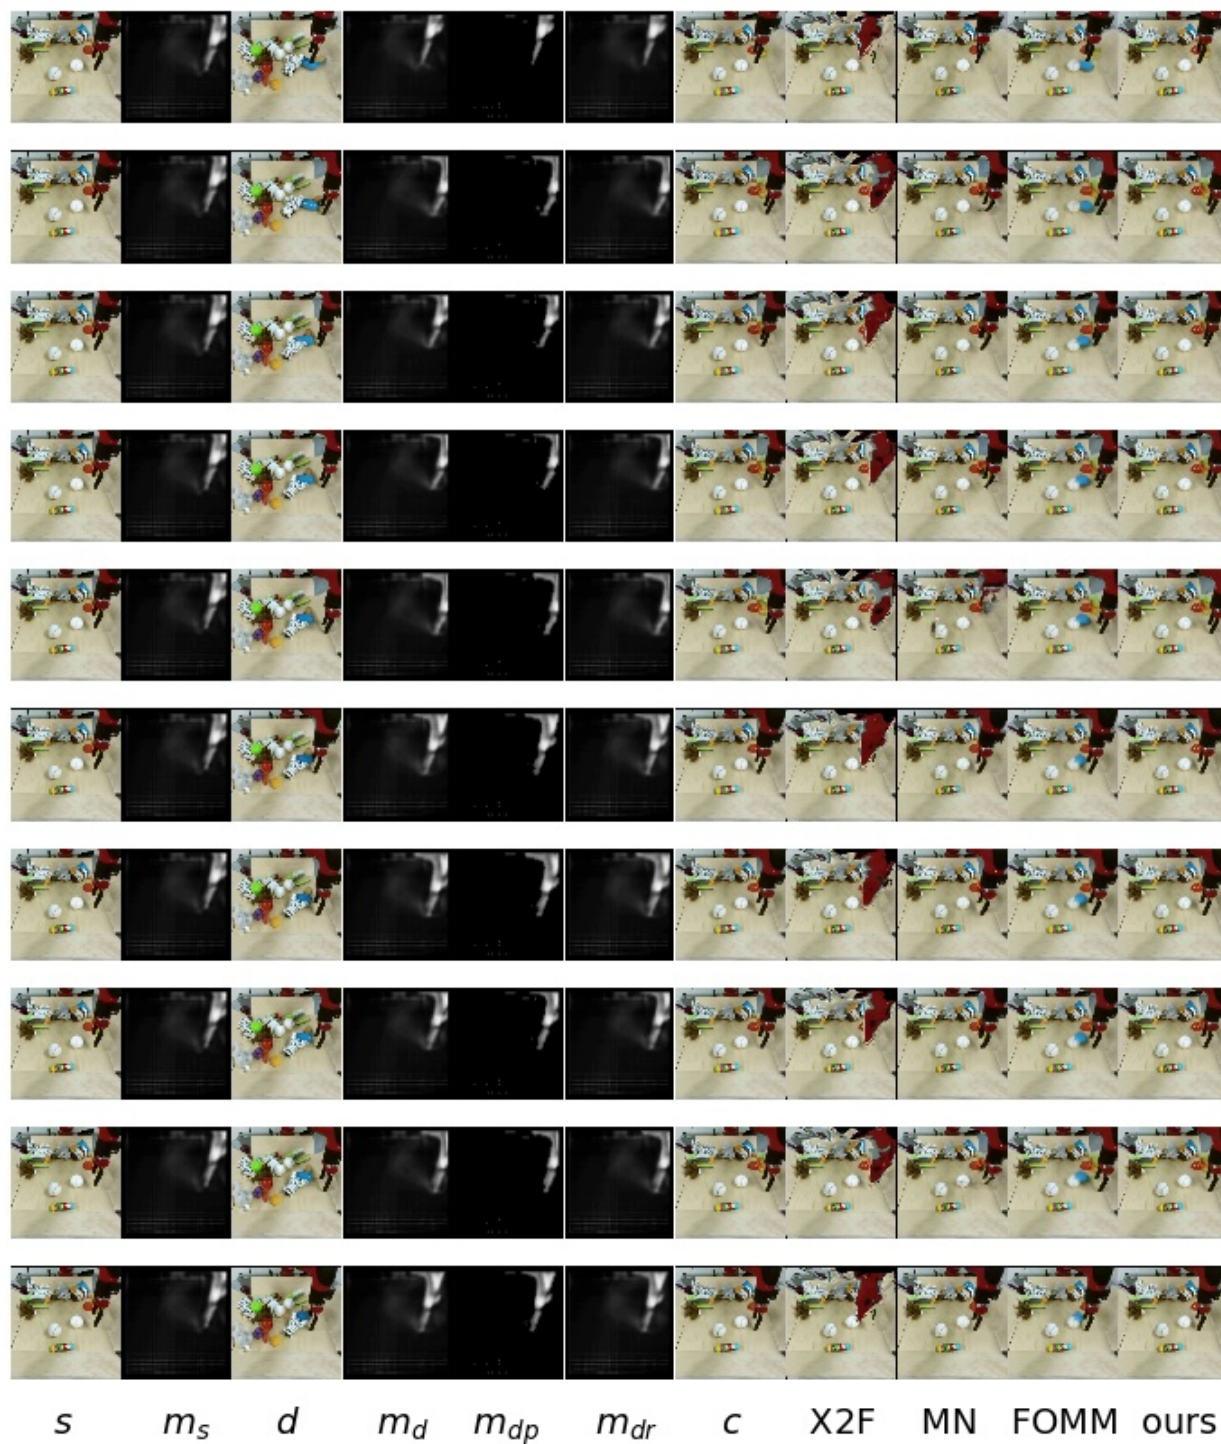

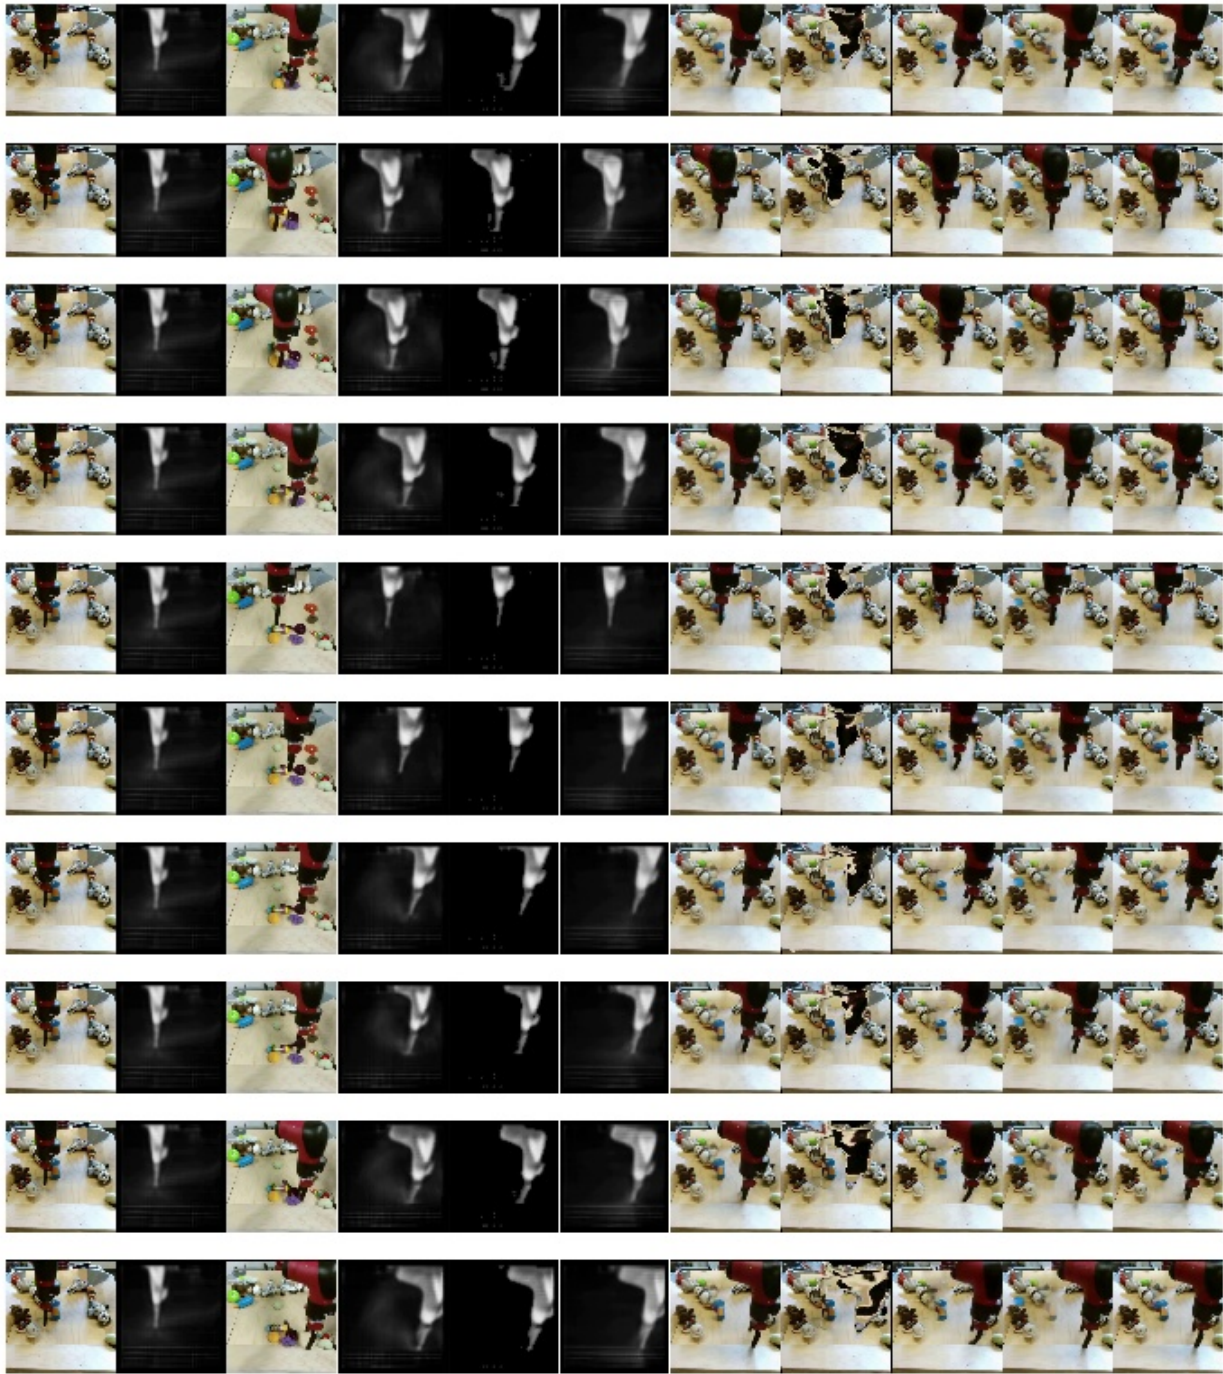

*s*    *m<sub>s</sub>*    *d*    *m<sub>d</sub>*    *m<sub>dp</sub>*    *m<sub>dr</sub>*    *c*    X2F    MN    FOMM    ours

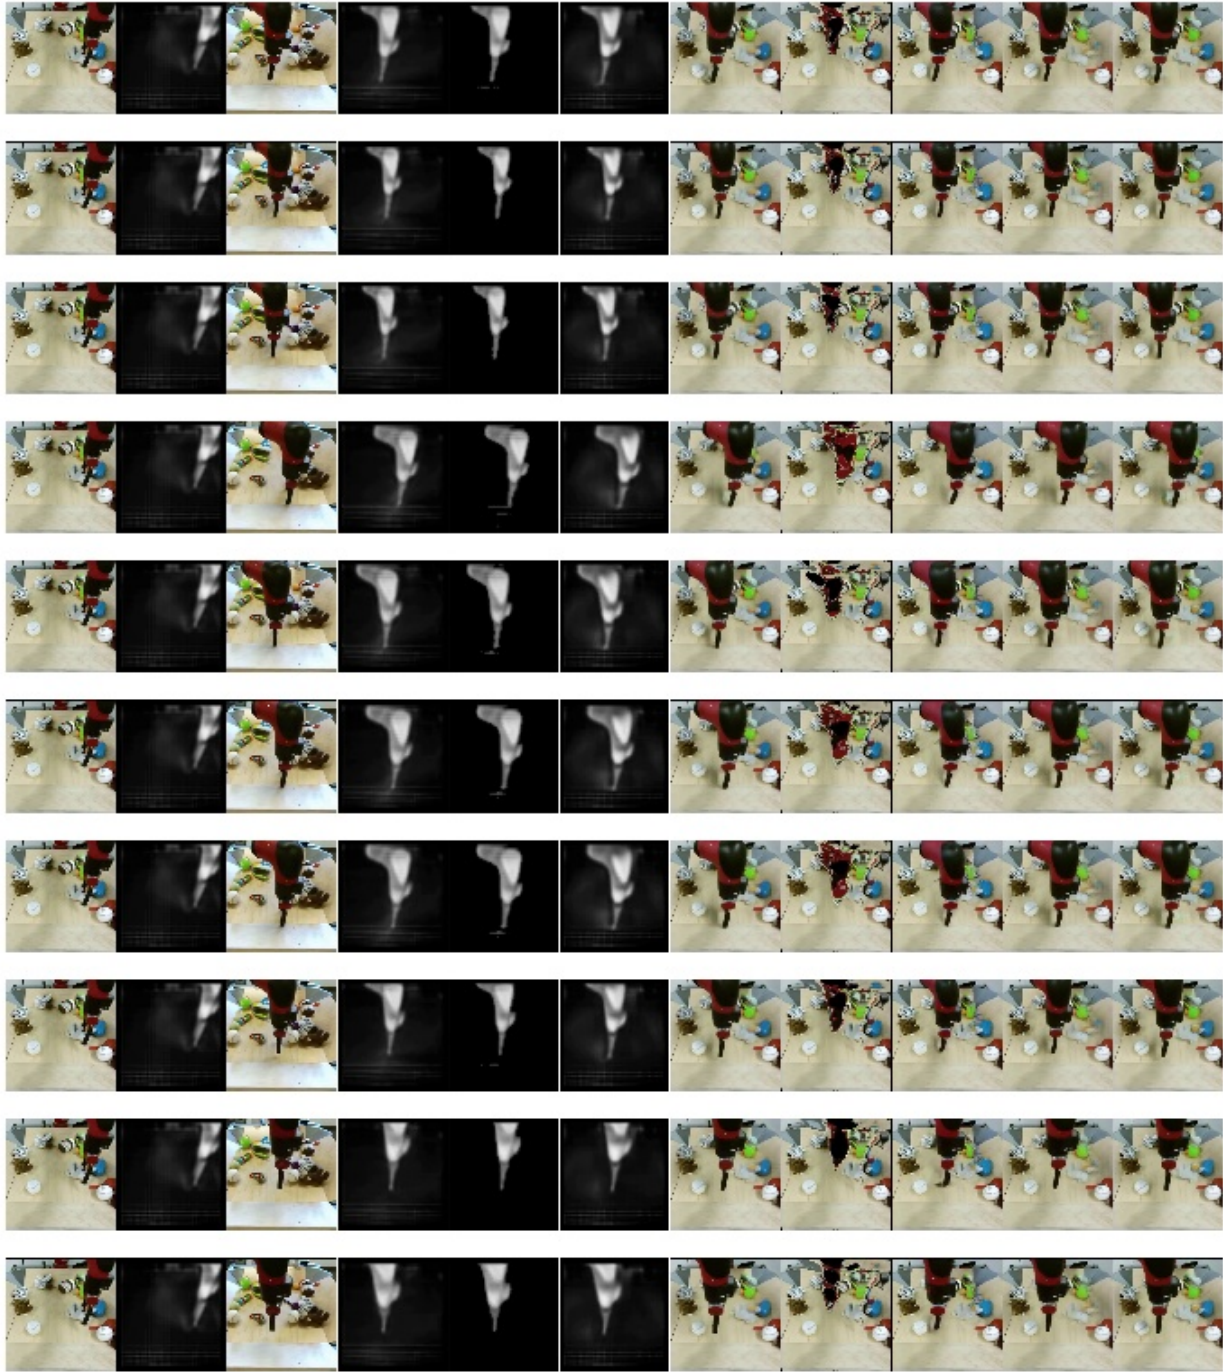

$s$      $m_s$      $d$      $m_d$      $m_{dp}$      $m_{dr}$      $c$     X2F    MN    FOMM    ours

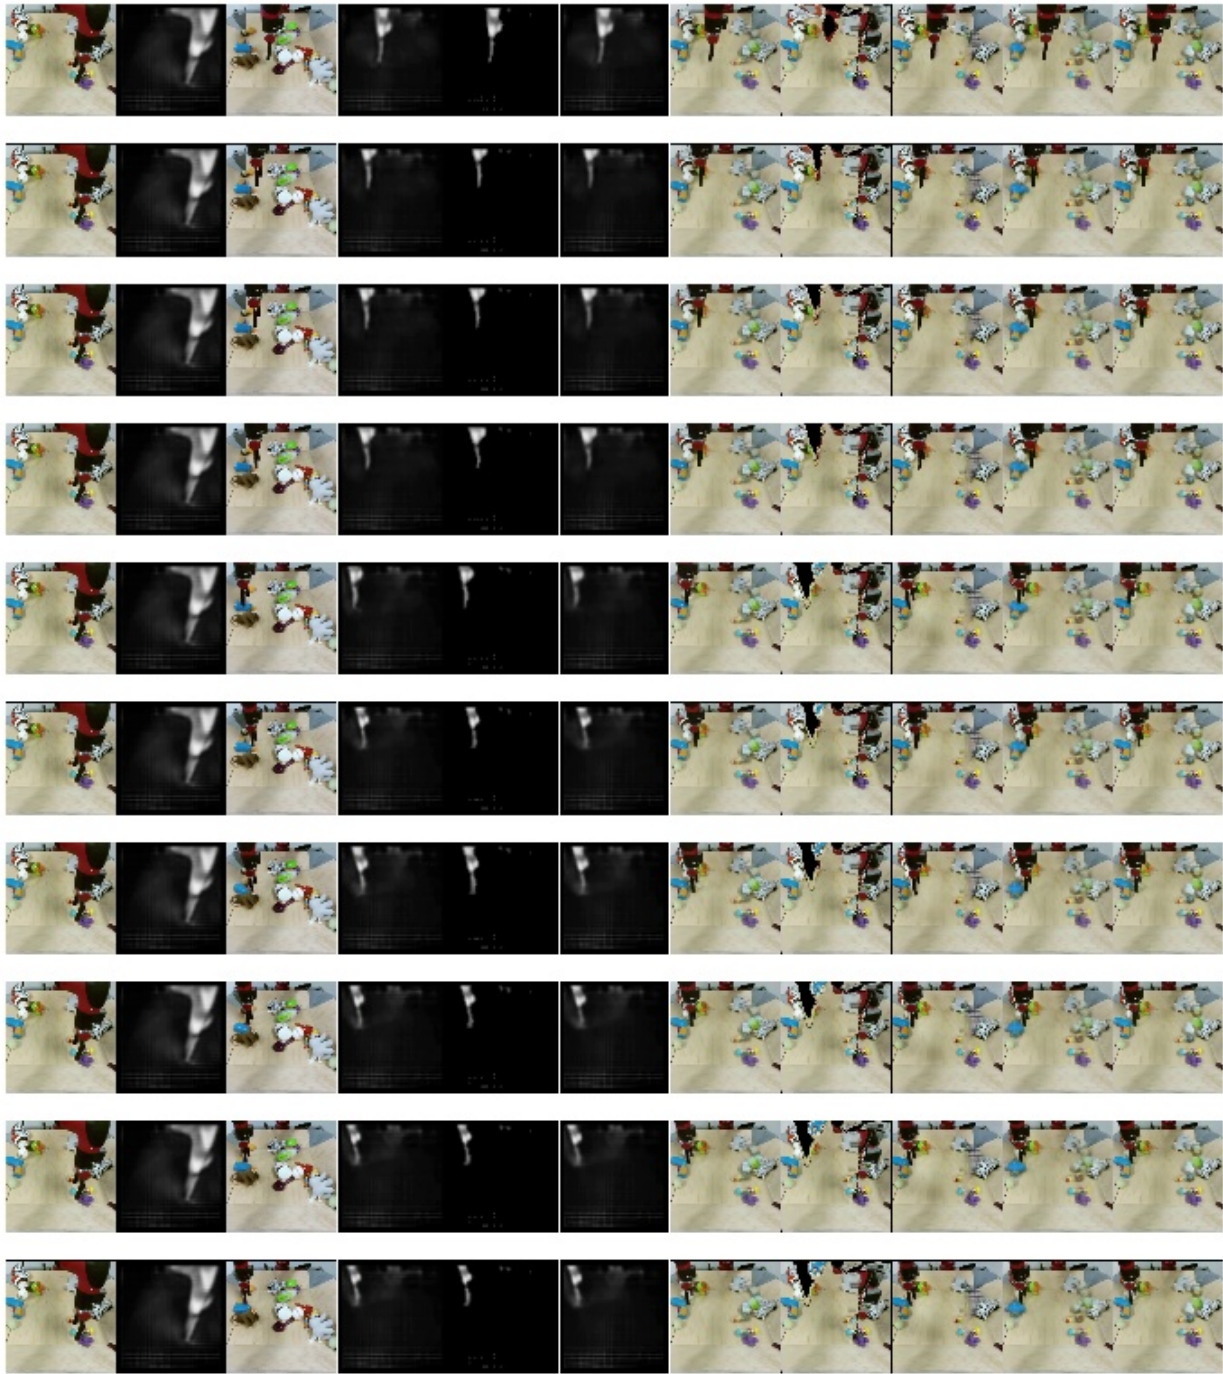

$s$     $m_s$     $d$     $m_d$     $m_{dp}$     $m_{dr}$     $c$    X2F   MN   FOMM   ours



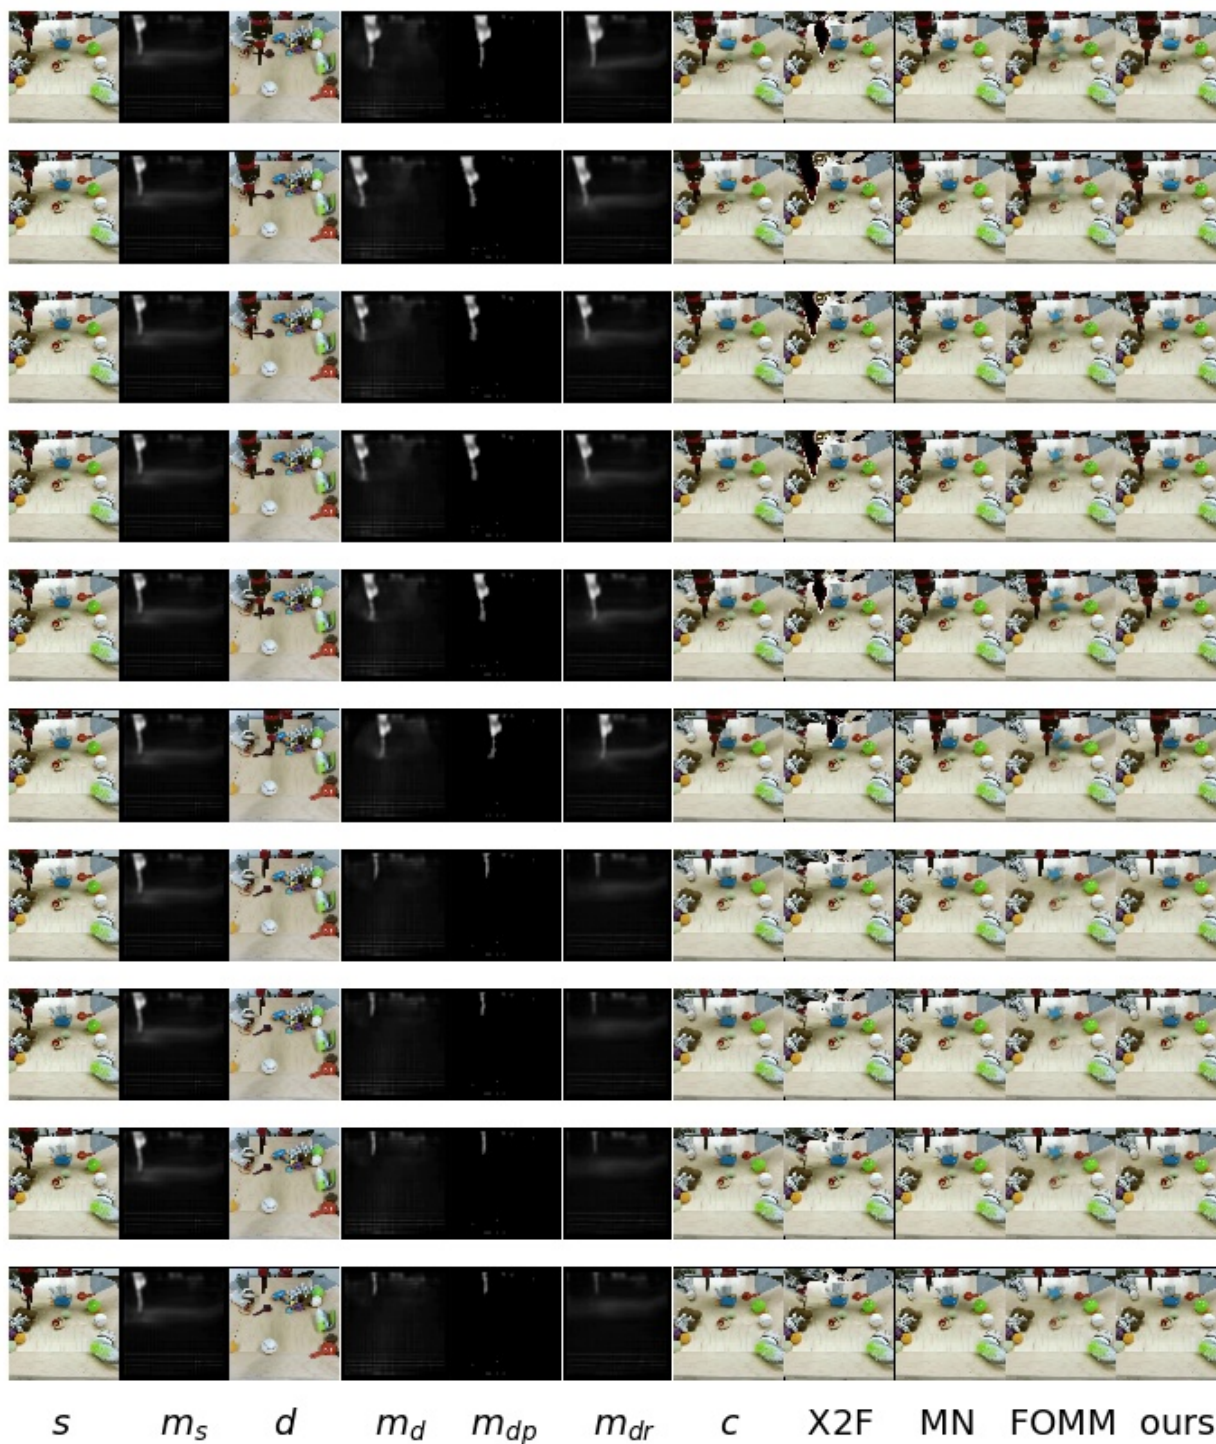

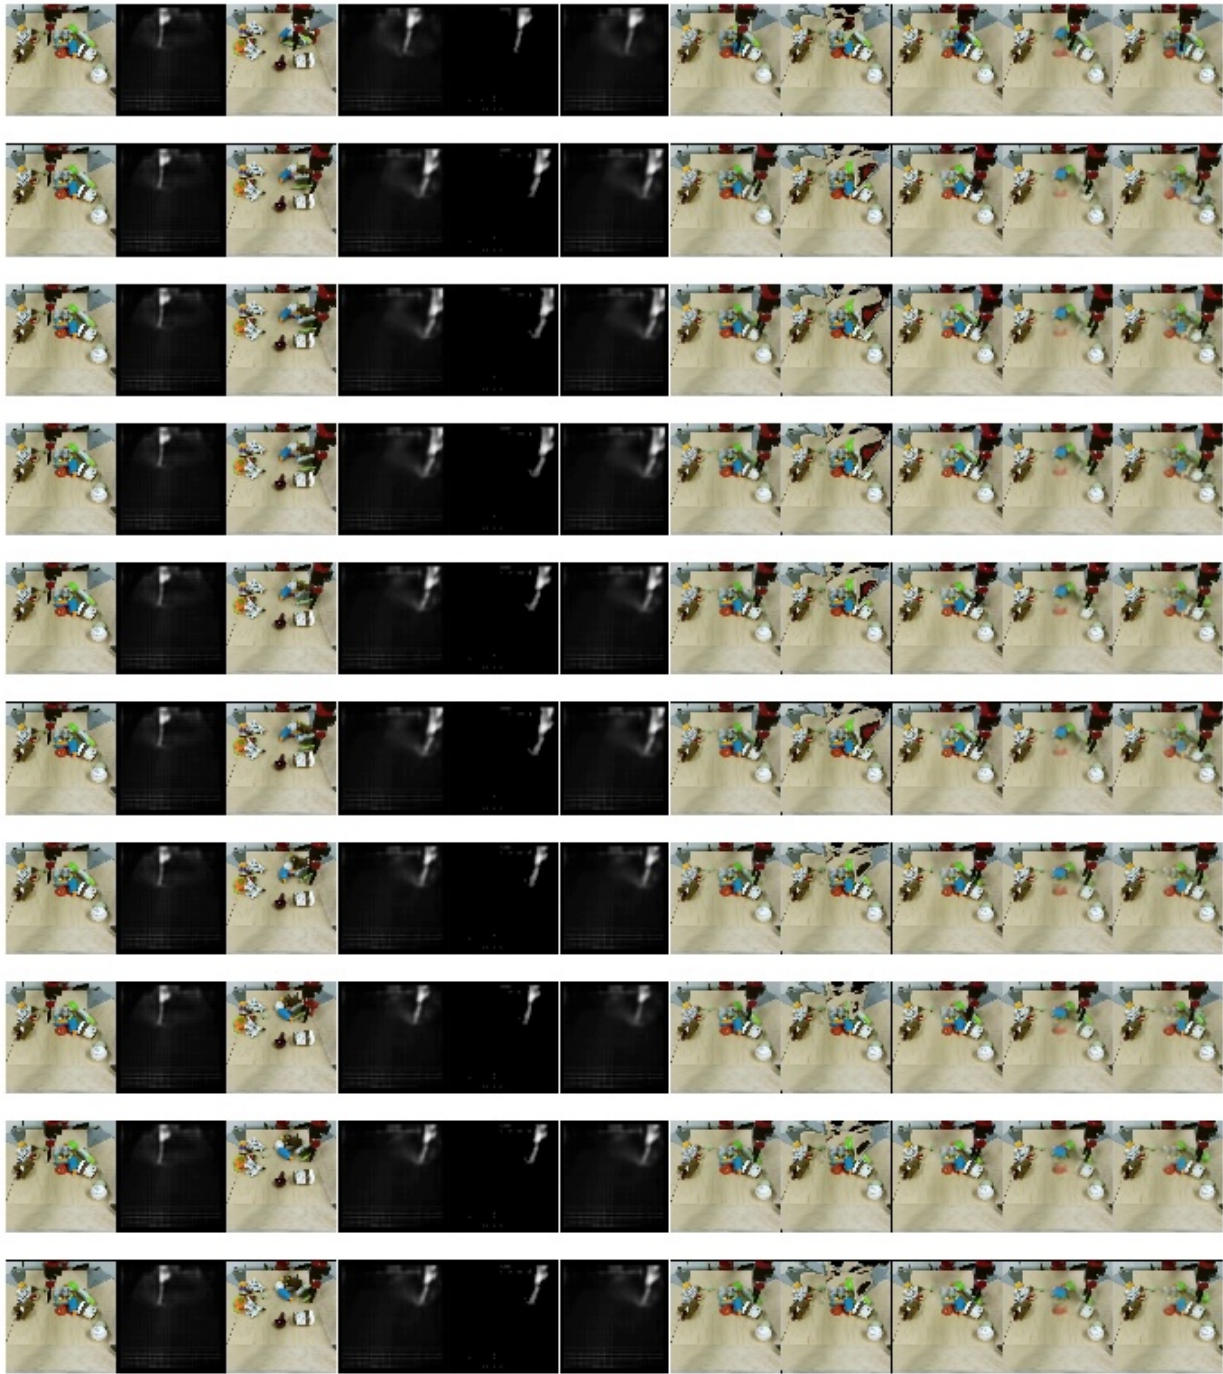

*s*    *m<sub>s</sub>*    *d*    *m<sub>d</sub>*    *m<sub>dp</sub>*    *m<sub>dr</sub>*    *c*    X2F    MN    FOMM    ours

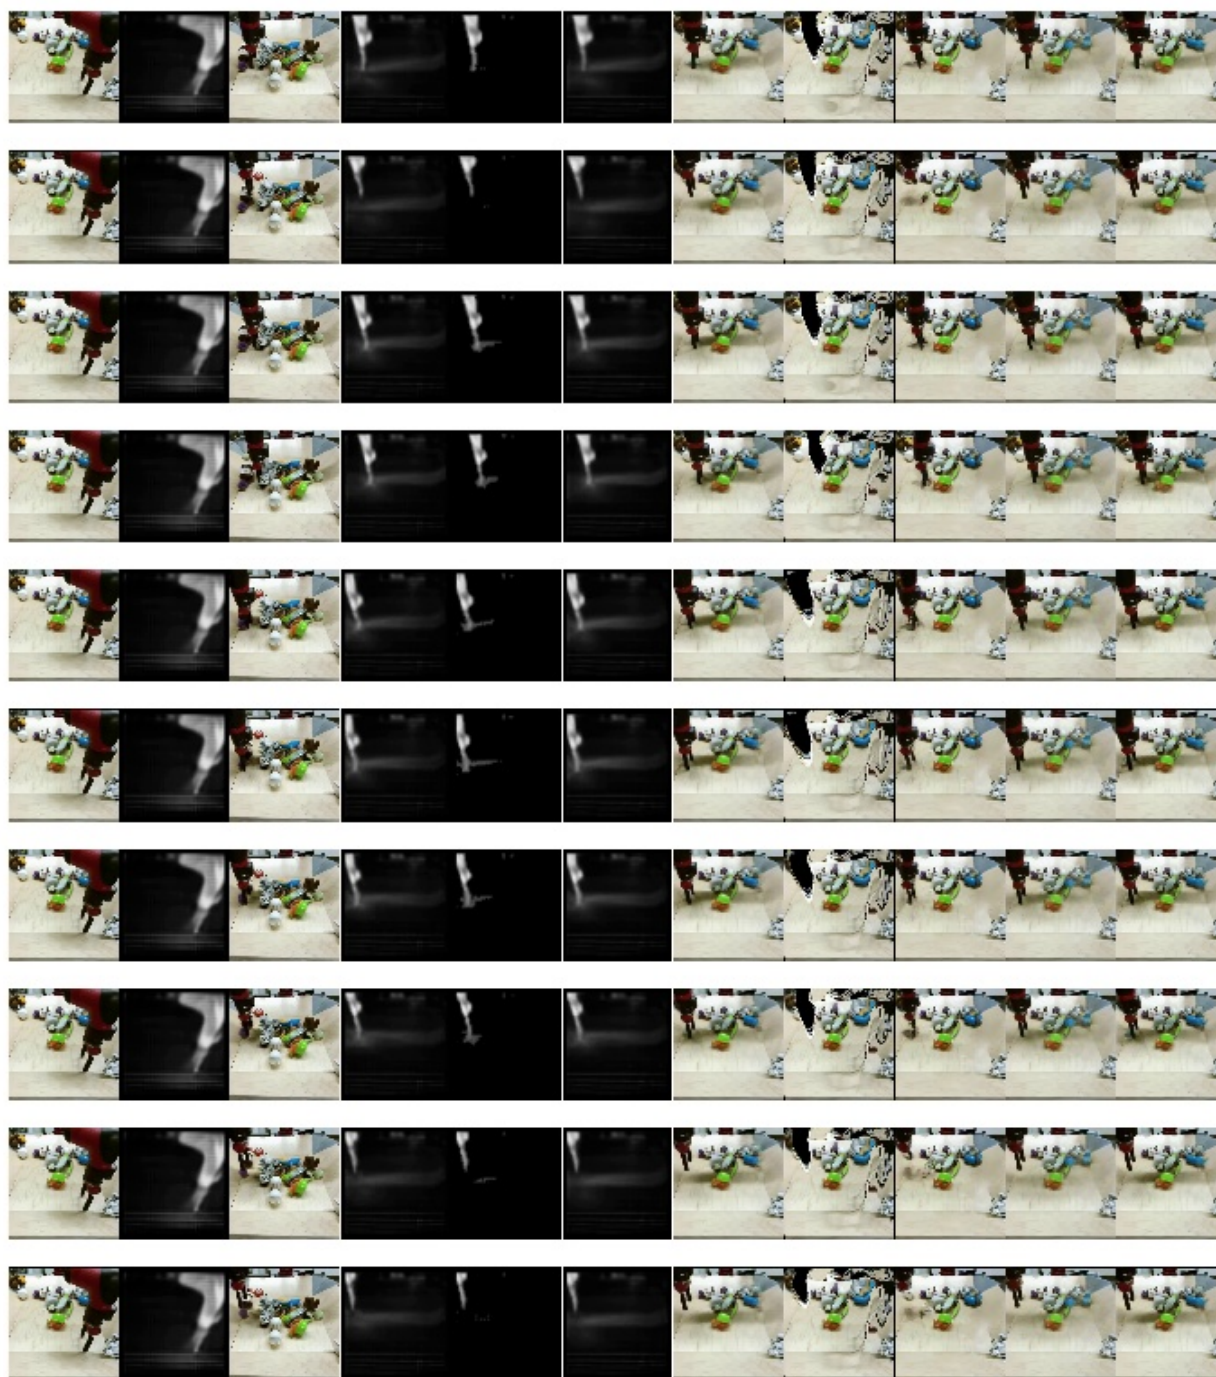

*s*     $m_s$     *d*     $m_d$      $m_{dp}$      $m_{dr}$     *c*    X2F    MN    FOMM    ours
